# Supplementary material
Source: MDPI journal article supplement (https://www.mdpi.com/2227-9717/11/6/1860)

# Supplementary Materials

## Synthesis and Biological Evaluation of $\alpha$ -Tocopherol Derivatives as Potential Anticancer Agents

Aneta Baj<sup>1,\*</sup>, Lucie Rárová<sup>2</sup>, Artur Ratkiewicz<sup>3</sup>, Miroslav Strnad<sup>4</sup> and Stanislaw Witkowski<sup>1</sup>

<sup>1</sup> Department of Organic Chemistry, Faculty of Chemistry, University of Białystok, Ciołkowskiego 1K, 15-245 Białystok, Poland; wit@uwb.edu.pl

<sup>2</sup> Department of Experimental Biology, Faculty of Science, Palacký University, Šlechtitelů 27, CZ-78371 Olomouc, Czech Republic; lucie.rarova@upol.cz

<sup>3</sup> Department of Physical Chemistry, Faculty of Chemistry, University of Białystok, Ciołkowskiego 1K, 15-245 Białystok, Poland; artrat@uwb.edu.pl

<sup>4</sup> Laboratory of Growth Regulators, Institute of Experimental Botany of the Czech Academy of Sciences, Faculty of Science, Palacký University, Šlechtitelů 27, CZ-78371 Olomouc, Czech Republic; miroslav.strnad@upol.cz

\* Correspondence: aneta.baj@uwb.edu.pl; Tel.: +48-85-738-80-41

### Table of Contents

|                                                                                                  |        |
|--------------------------------------------------------------------------------------------------|--------|
| 1. Experimental procedures for the preparation of $\alpha$ -tocopheryl phosphate ( $\alpha$ -TP) | S2     |
| 2. <sup>1</sup> H and <sup>13</sup> C NMR spectra of the synthesized compounds                   | S3-S24 |

## 1. Experimental procedures for the preparation of $\alpha$ -tocopheryl phosphate ( $\alpha$ -TP)

### 1.1. Synthesis of compound **S1**

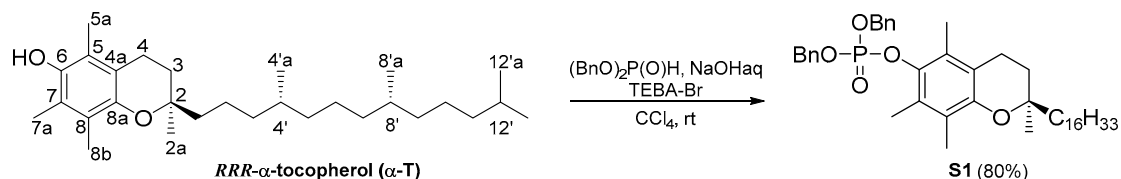

TEBA-Br (28 mg) and 50% aqueous NaOH solution (0.9 mL) were added to a stirred solution of  $\alpha$ -T (1.29 g, 3 mmol) in  $\text{CCl}_4$  (6 mL) at room temperature. After 10 min the solution of dibenzyl phosphite (1.069 g, 4.08 mmol, 1.36 eq) in  $\text{CCl}_4$  (7.5 mL) was added dropwise, and stirring was continued for 36 hours. Next, to the reaction mixture was added dichloromethane (20 mL) and it was washed with 2% hydrochloric acid, and water, dried over anhydrous  $\text{Na}_2\text{SO}_4$ , and concentrated under vacuum. The crude product was purified using FC (hexane/ethyl acetate, 7:1, v/v) to give product **S1** as a colorless oil (1.655 g, 80% yield).

**S1**:  $^{31}\text{P}\{^1\text{H}\}$  NMR (160 MHz,  $\text{CDCl}_3$ )  $\delta$  -4.51 ppm;  $^1\text{H}$  NMR (200 MHz,  $\text{CDCl}_3$ )  $\delta$  7.34–7.30 (m, 10H, H-Ar), 5.10 (d,  $J$  = 8.0 Hz, 4H,  $\text{CH}_2\text{Ph}$ ), 2.56 (t,  $J$  = 6.8 Hz, 2H, H-4), 2.20 (s, 3H, H-8b), 2.17 (s, 3H, H-7a), 2.08 (s, 3H, H-5a), 1.83–1.72 (m, 2H, H-3), 1.30–1.02 (m, 24H, H-2a, H-1'–H-12'), 0.91–0.85 (m, 12H, H-4'a, H-8'a, H-12'a, H-13') ppm;  $^{13}\text{C}\{^1\text{H}\}$  NMR (100 MHz,  $\text{CDCl}_3$ )  $\delta$  148.8 (C-8a), 140.7 (C-6), 135.9 ( $\text{C}_{\text{Ar}}$ ), 135.8 ( $\text{C}_{\text{Ar}}$ ), 128.42, 128.35, 127.8 (10 x  $\text{CH}_{\text{Ar}}$ ), 127.1 (C-7), 125.3 (C-5), 123.2 (C-8), 117.6 (C-4a), 74.9 (C-2), 69.7 ( $\text{CH}_2\text{Ph}$ ), 69.6 ( $\text{CH}_2\text{Ph}$ ), 40.0 (C-1'), 39.3 (C-11'), 37.4 (C-3'), 37.4 (C-9'), 37.3 (C-5', C-7'), 32.8 (C-8'), 32.7 (C-4'), 31.2 (C-3), 27.9 (C-12'), 24.8 (C-10'), 24.4 (C-6'), 23.8 (C-2a), 22.7 (C-12'a), 22.6 (C-13'), 21.0 (C-2'), 20.7 (C-4), 19.7 (C-8'a), 19.6 (C-4'a), 13.8 (C-7a), 13.0 (C-8b), 11.8 (C-5a) ppm; IR (KBr)  $\nu_{\text{max}}$  3051, 3029, 2923, ~2000–1600 (aromatic overtones), 1457, 1278, 964, 741  $\text{cm}^{-1}$ ; HRMS (ESI)  $m/z$  713.4309 (calcd for  $\text{C}_{43}\text{H}_{63}\text{NaO}_5\text{P}^+$  [ $\text{M}+\text{Na}$ ] $^+$  713.4305).

### 1.2. Synthesis of *RRR*- $\alpha$ -tocopheryl phosphate ( $\alpha$ -TP)

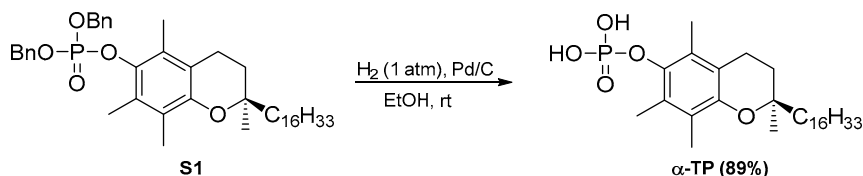

The mixture of compound **S1** (0.36 g, 0.52 mmol) and 10% Pd/C (80 mg) in EtOH (30 mL) was hydrogenated under atmospheric pressure at room temperature. After total conversion (TLC control) the reaction mixture was filtered through a pad of Celite and the filtrate was evaporated under reduced pressure to give  $\alpha$ -TP as a white solid (236 mg, 89% yield).

**$\alpha$ -TP**: mp. 120.8–122.7°C;  $^{31}\text{P}\{^1\text{H}\}$  NMR (160 MHz):  $\delta$  -4.02 ( $\text{CD}_3\text{OD}$ ), -1.51 ( $\text{CDCl}_3$ ) ppm;  $^1\text{H}$  NMR (400 MHz,  $\text{CD}_3\text{OD}$ ):  $\delta$  2.61 (t,  $J$  = 6.7 Hz, 2H, H-4), 2.22 (s, 3H, H-8b), 2.18 (s, 3H, H-7a), 2.07 (s, 3H, H-5a), 1.821.77 (m, 2H, H-3), 1.59–1.02 (m, 24H, H-2a, H-1'–H-12'), 0.89–0.87 (m, 12H, H-4'a, H-8'a, H-12'a, H-13') ppm;  $^{13}\text{C}\{^1\text{H}\}$  NMR (100 MHz,  $\text{CD}_3\text{OD}$ ):  $\delta$  149.5 (C-8a), 143.0 (C-6), 128.4 (C-7), 126.7 (C-5), 123.8 (C-8), 118.8 (C-4a), 75.9 (C-2), 40.6 (C-1'), 40.5 (C-11'), 38.5 (C-3'), 38.5 (C-9'), 38.4 (C-5', C-7'), 33.9 (C-8'), 33.8 (C-4'), 32.7 (C-3), 29.2 (C-12'), 25.9 (C-10'), 25.4 (C-6'), 24.2 (C-2a), 23.1 (C-12'a), 23.0 (C-13'), 22.0 (C-2'), 21.7 (C-4), 20.20 (8'a), 20.17 (C-4'a), 14.2 (C-7a), 13.3 (C-8b), 12.1 (C-5a) ppm; IR (KBr)  $\nu_{\text{max}}$  2930 (br), 1465, 1225, 1092, 988, 490  $\text{cm}^{-1}$ ; HRMS  $m/z$  511.3551 (calcd for  $\text{C}_{29}\text{H}_{52}\text{O}_5\text{P}^+$  [ $\text{M}+\text{H}$ ] $^+$  511.3547).  $^1\text{H}$  and  $^{13}\text{C}$  NMR data were consistent with those reported in the literature [Harper, R.A.; Saleh, M.M.; Carpenter, G.; Abbate, V.; Proctor, G.; Harvey, R.D.; Gambogi, R.J.; Geonnotti, A.; Hider, R.; Jones, S.A. Soft, Adhesive (+) Alpha Tocopherol Phosphate Planar Bilayers That Control Oral Biofilm Growth through a Substantive Antimicrobial Effect. *Nanomedicine Nanotechnol. Biol. Med.* **2018**, *14*, 2307–2316, doi:10.1016/j.nano.2017.12.024].

2.  $^1\text{H}$  and  $^{13}\text{C}$  NMR spectra of the synthesized compounds

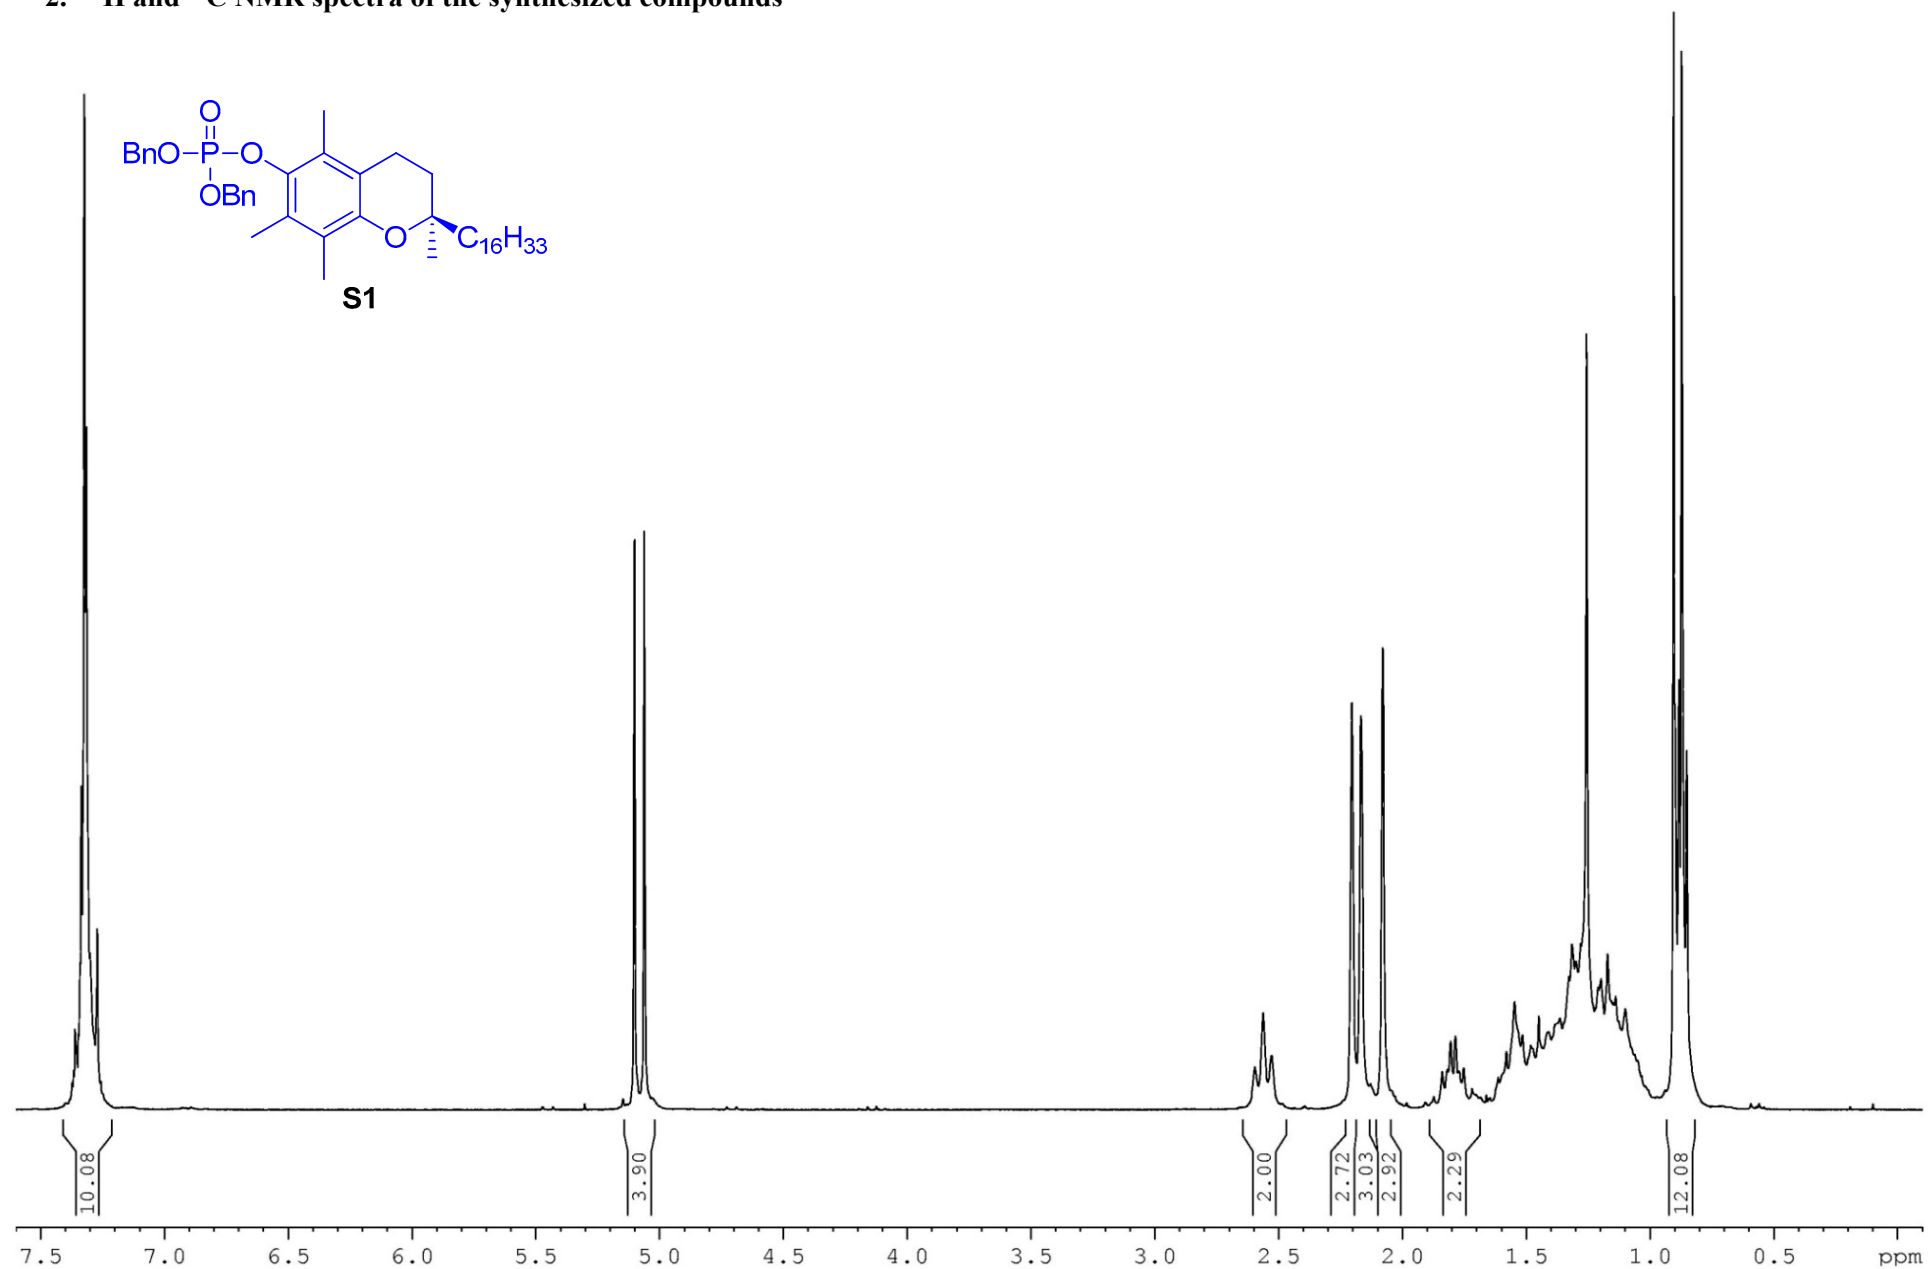

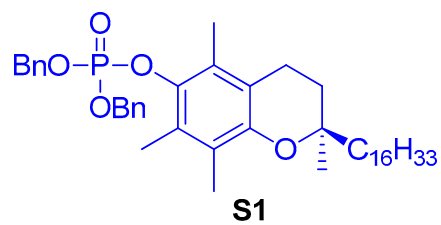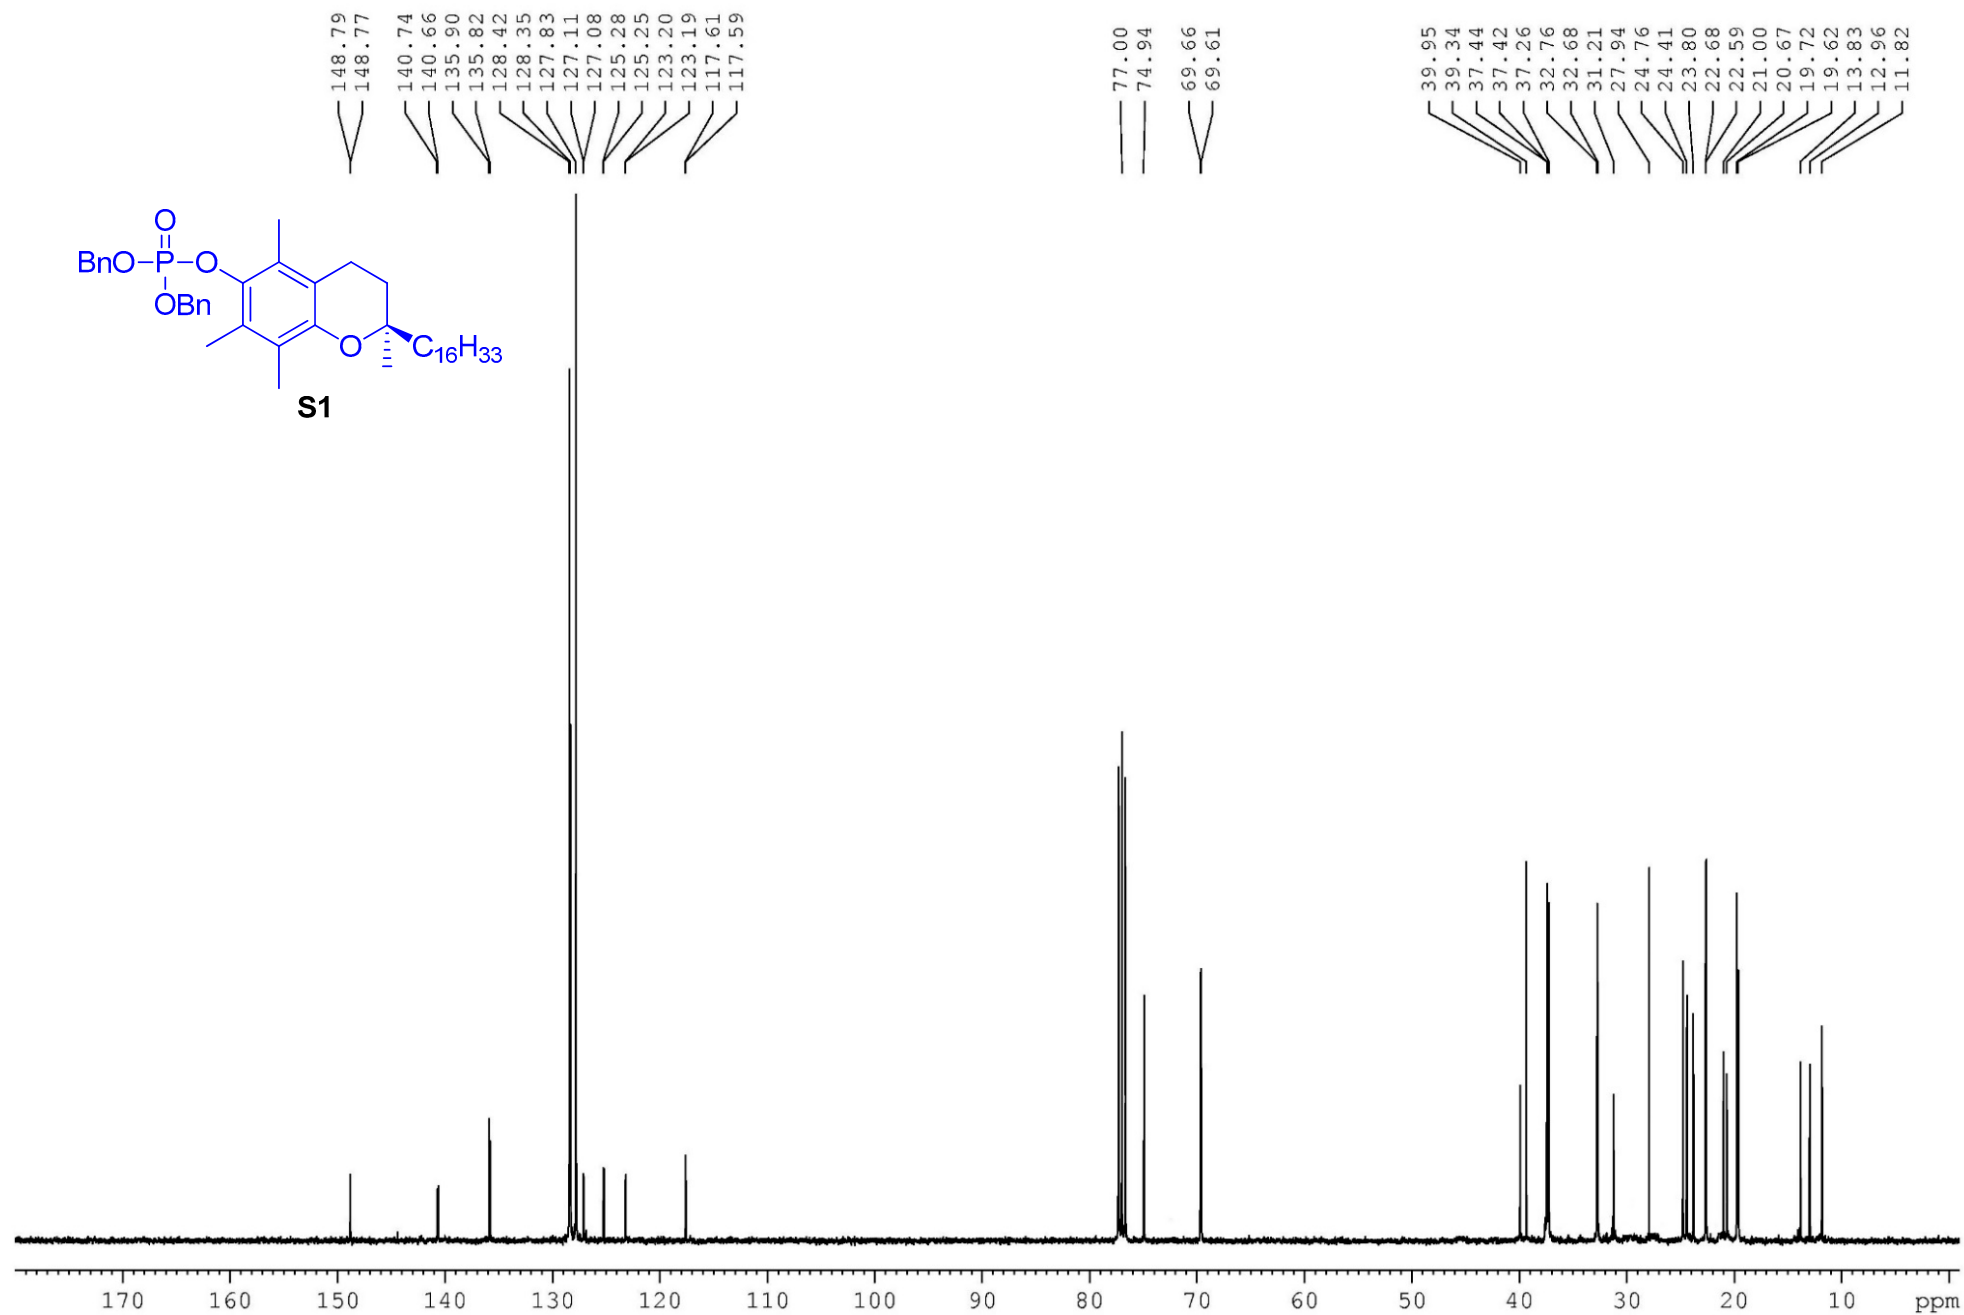

S4

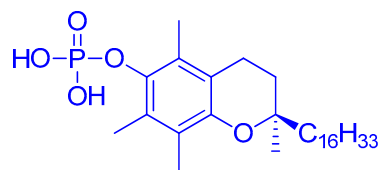

$\alpha$ -TP

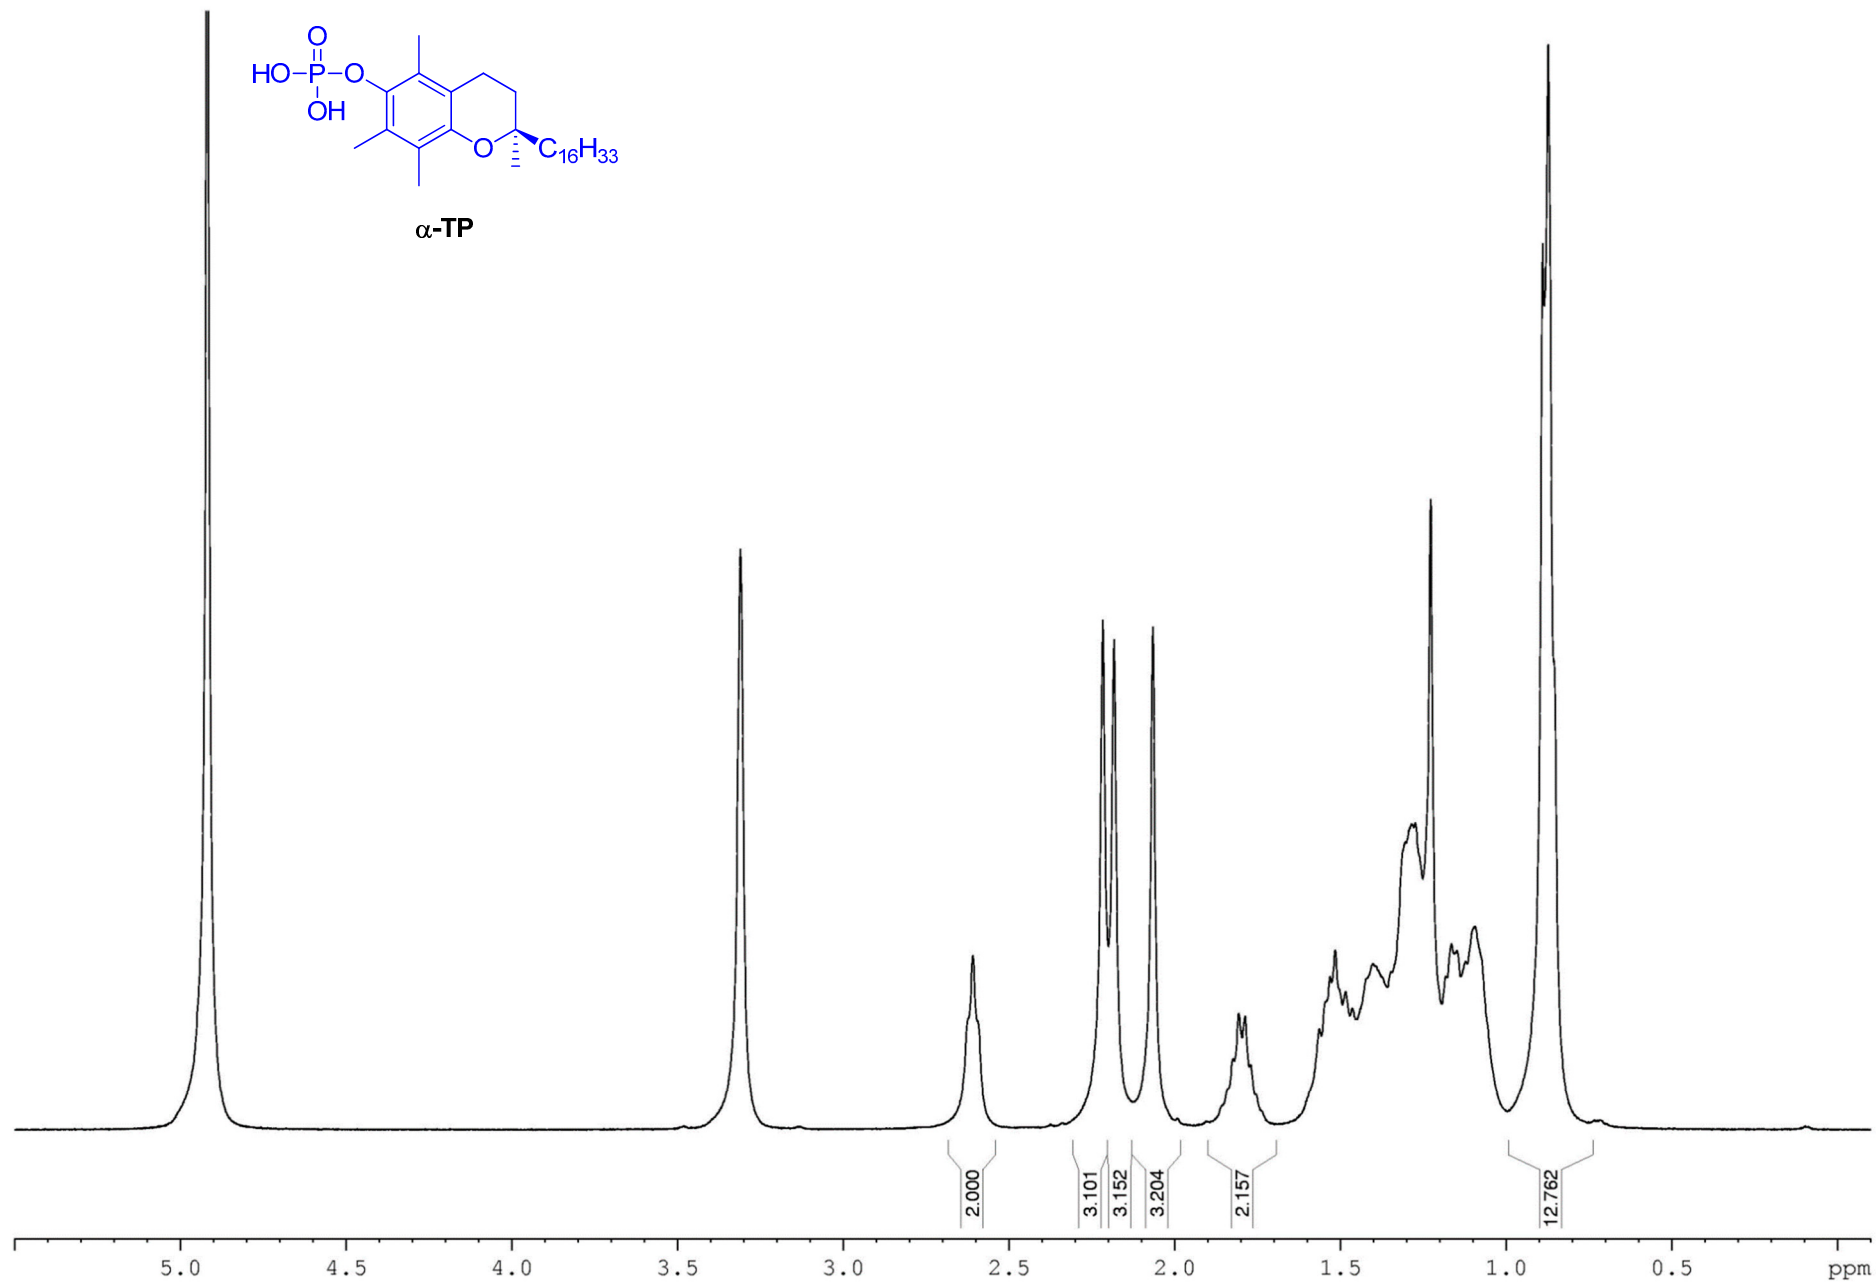

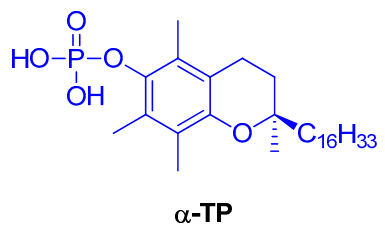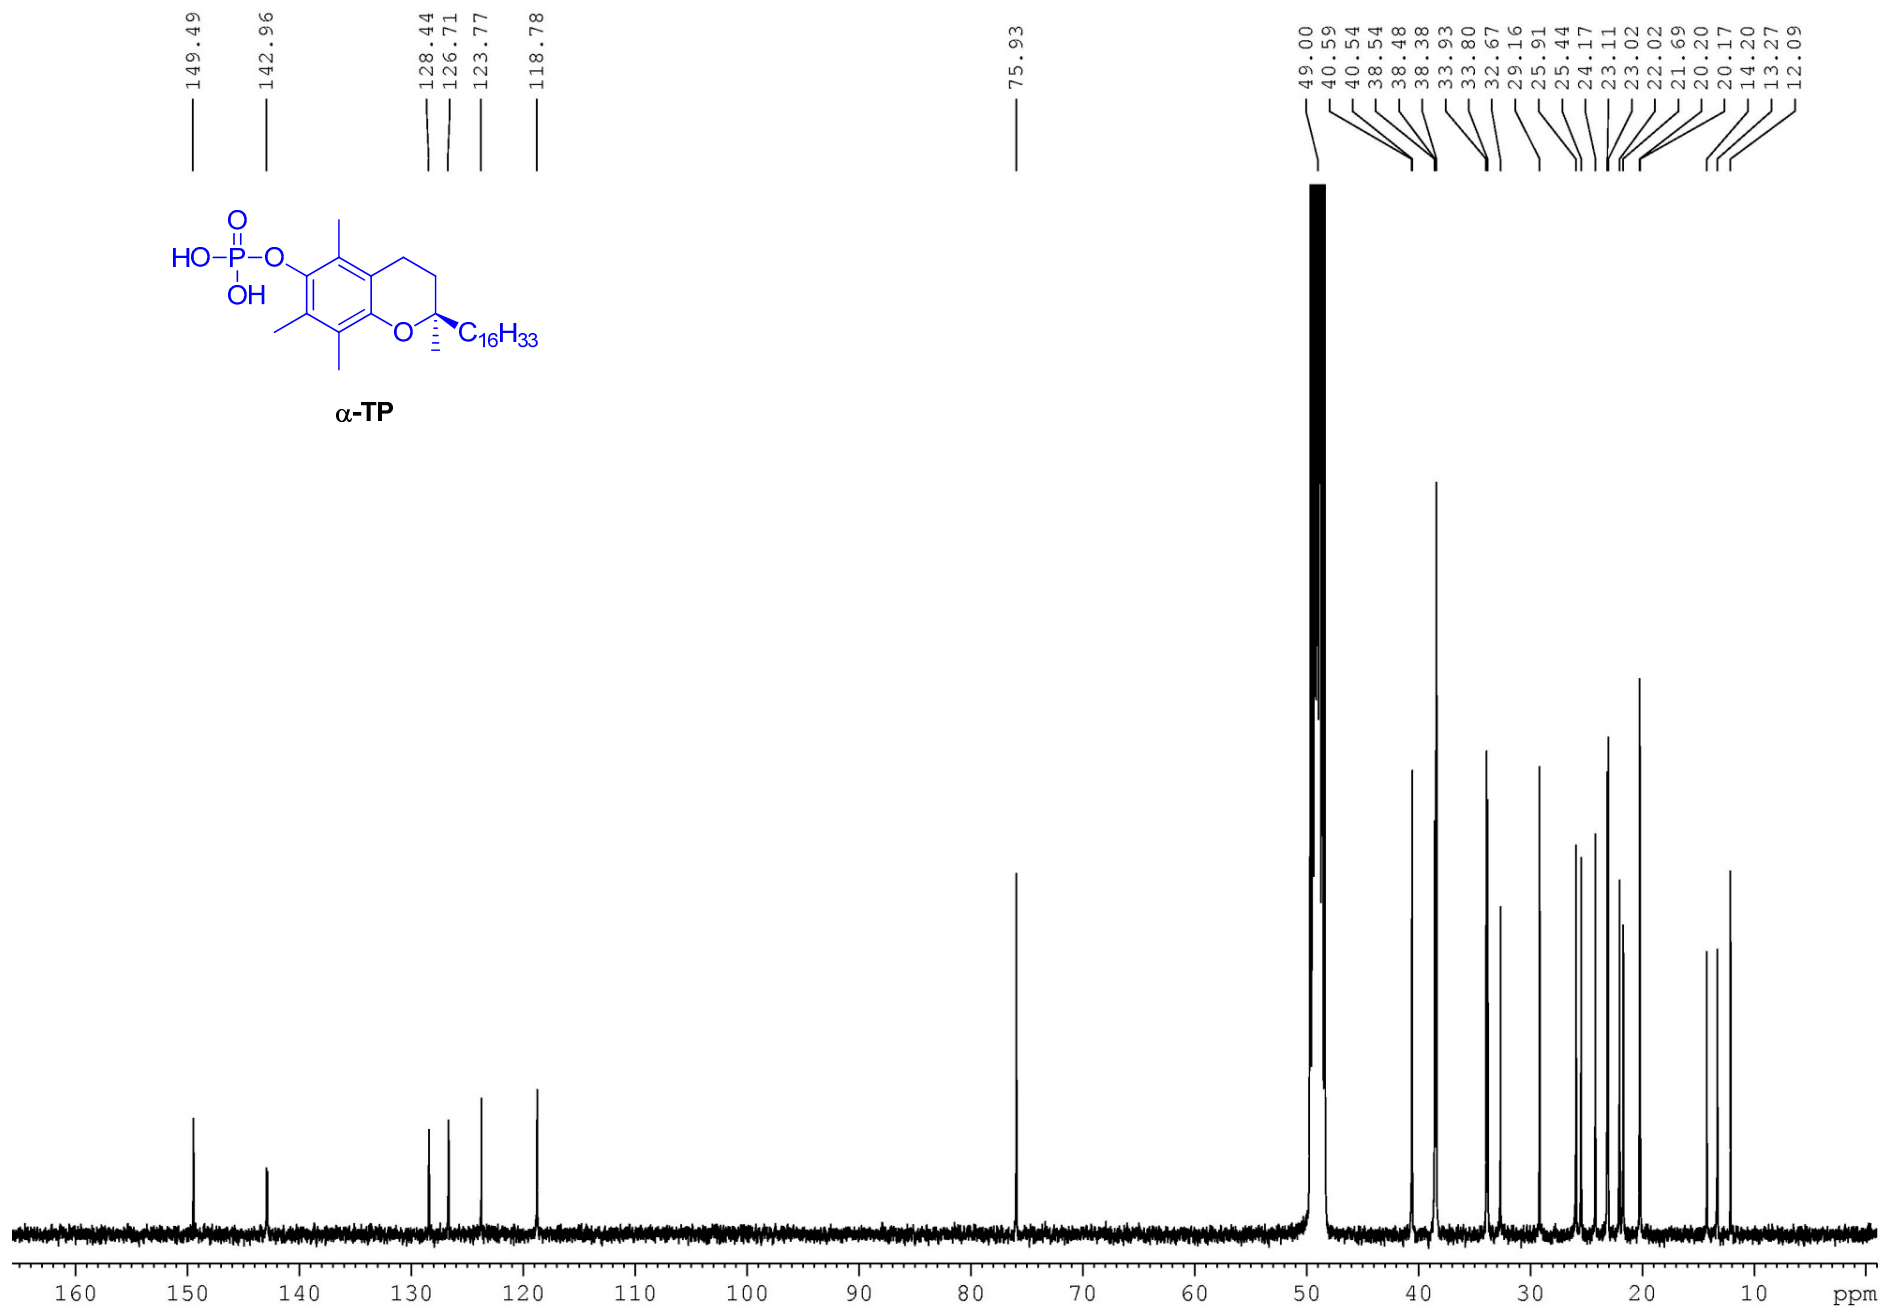

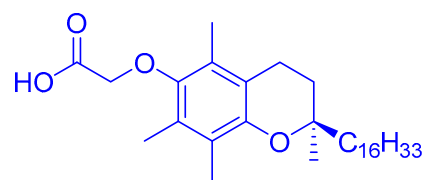

$\alpha$ -TEA

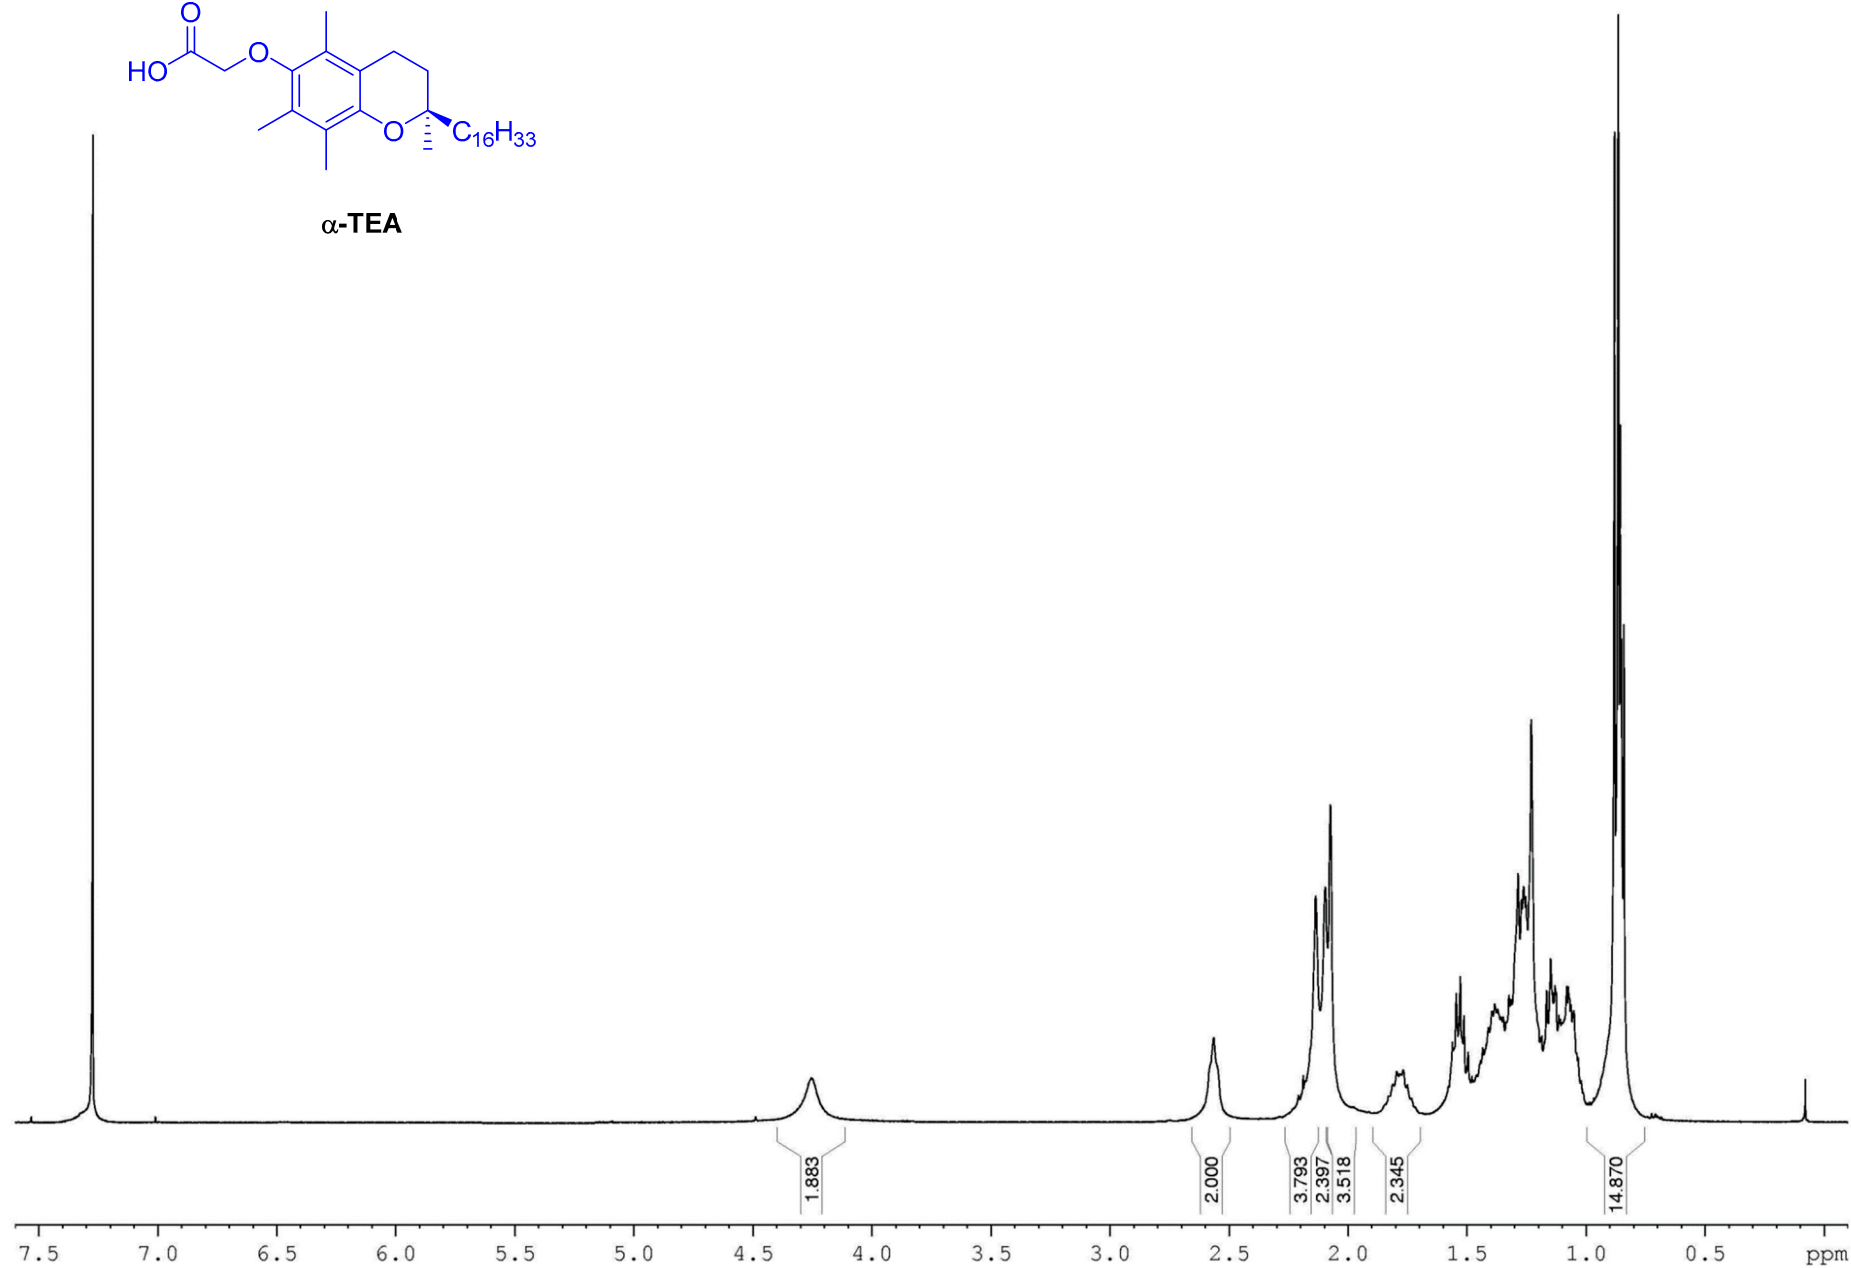

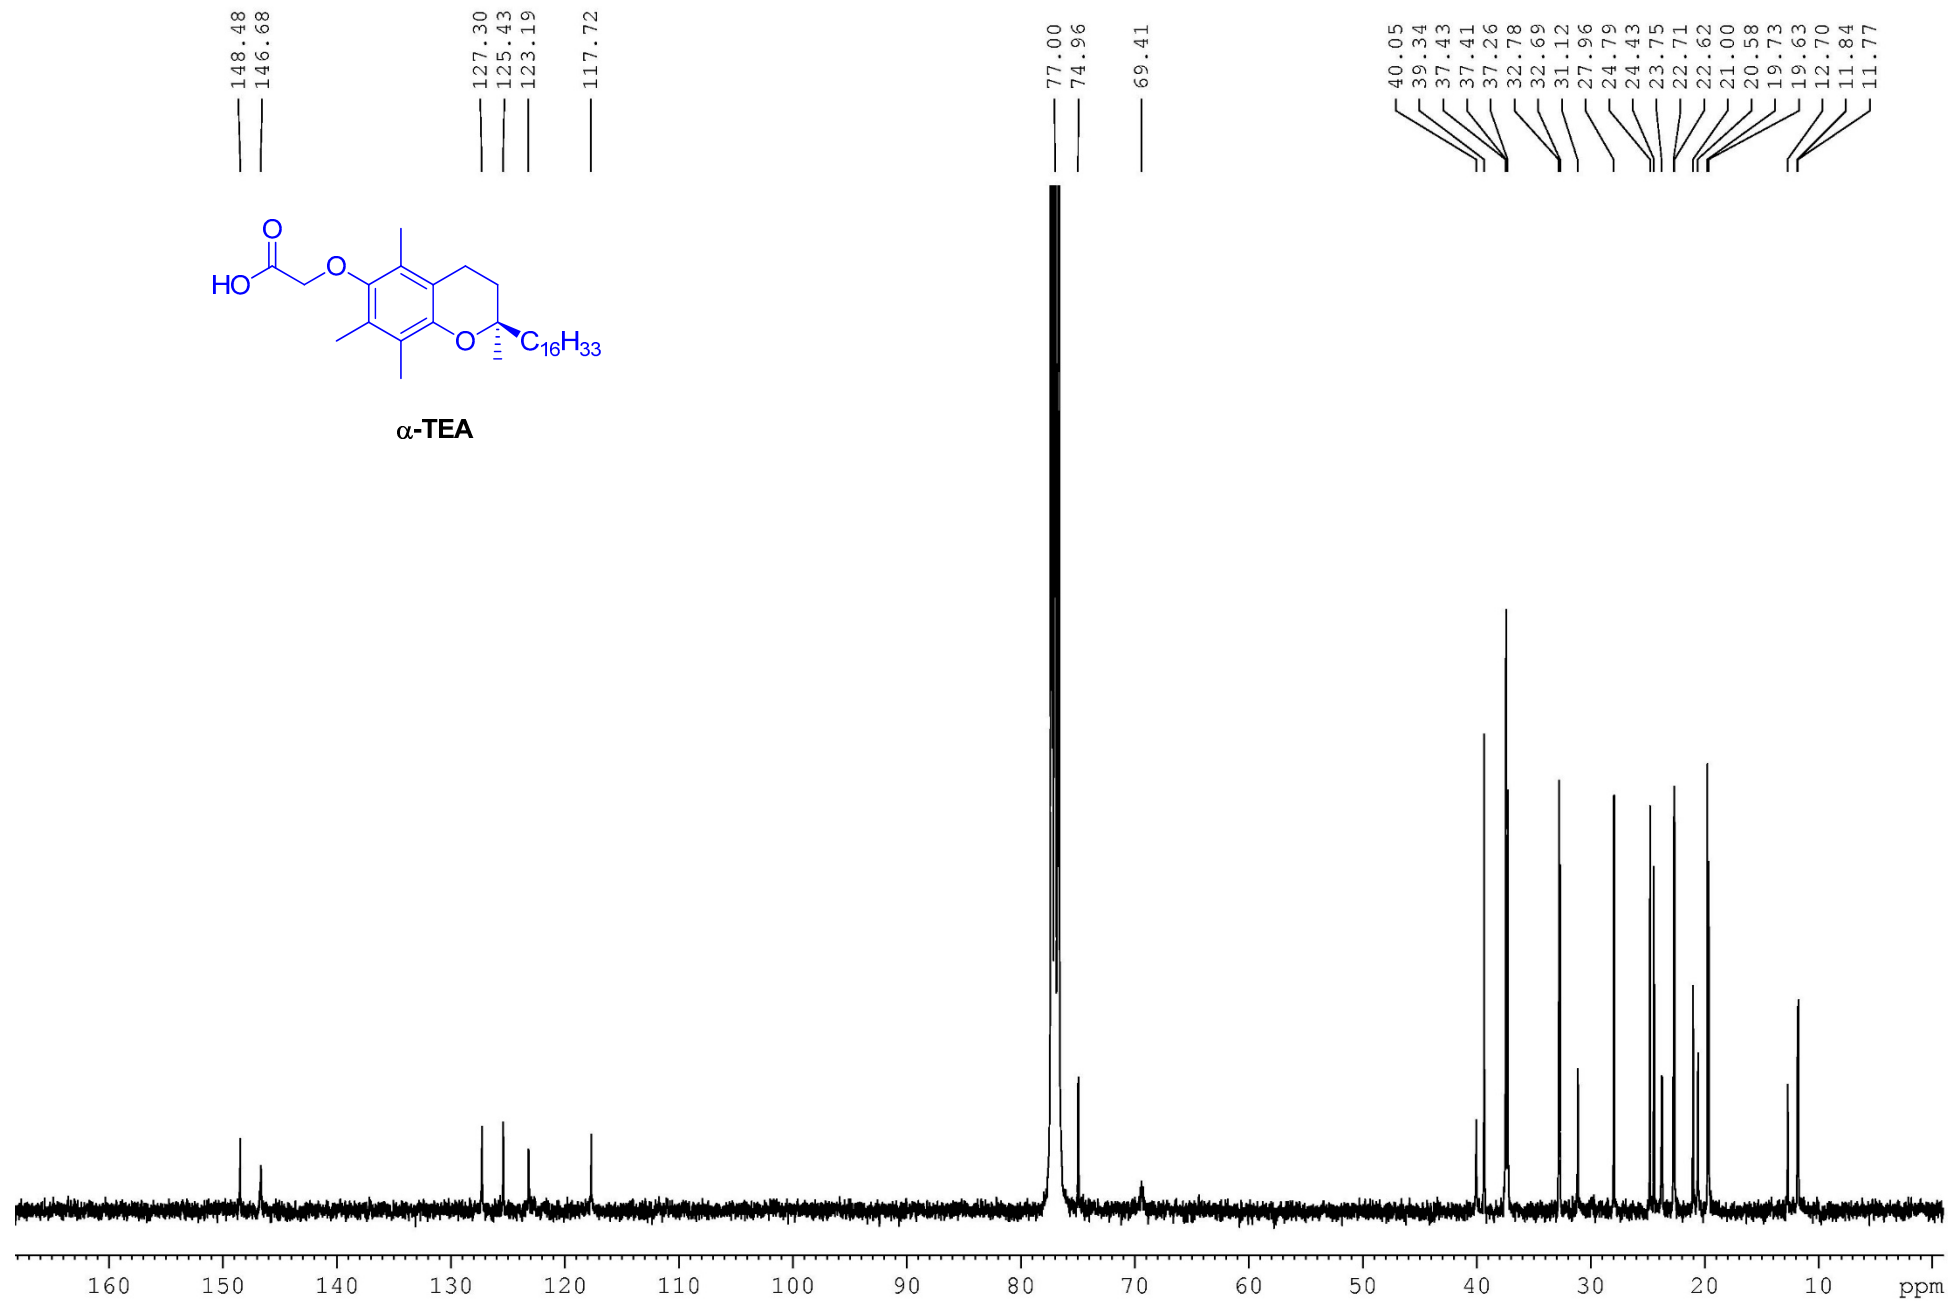

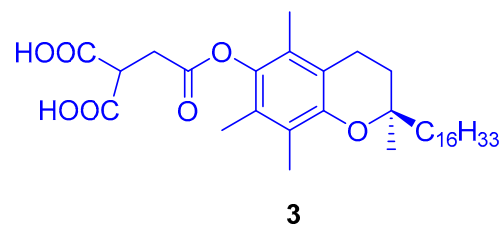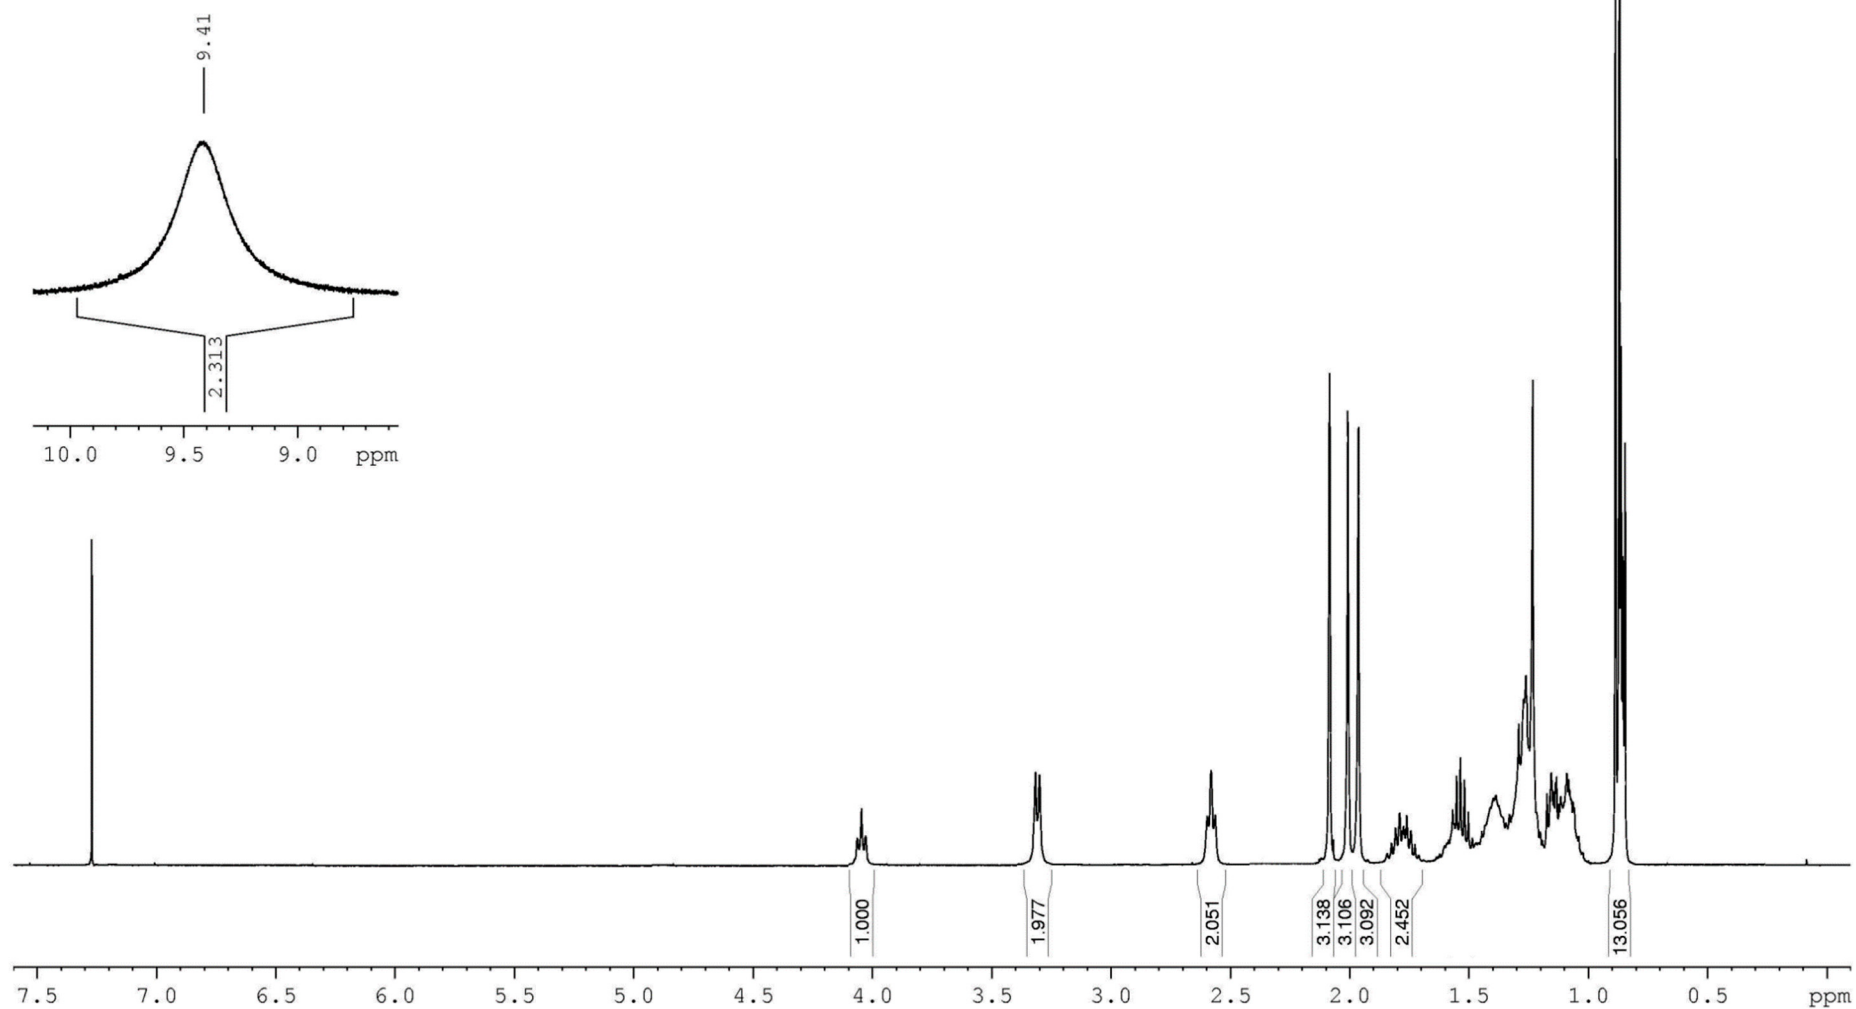

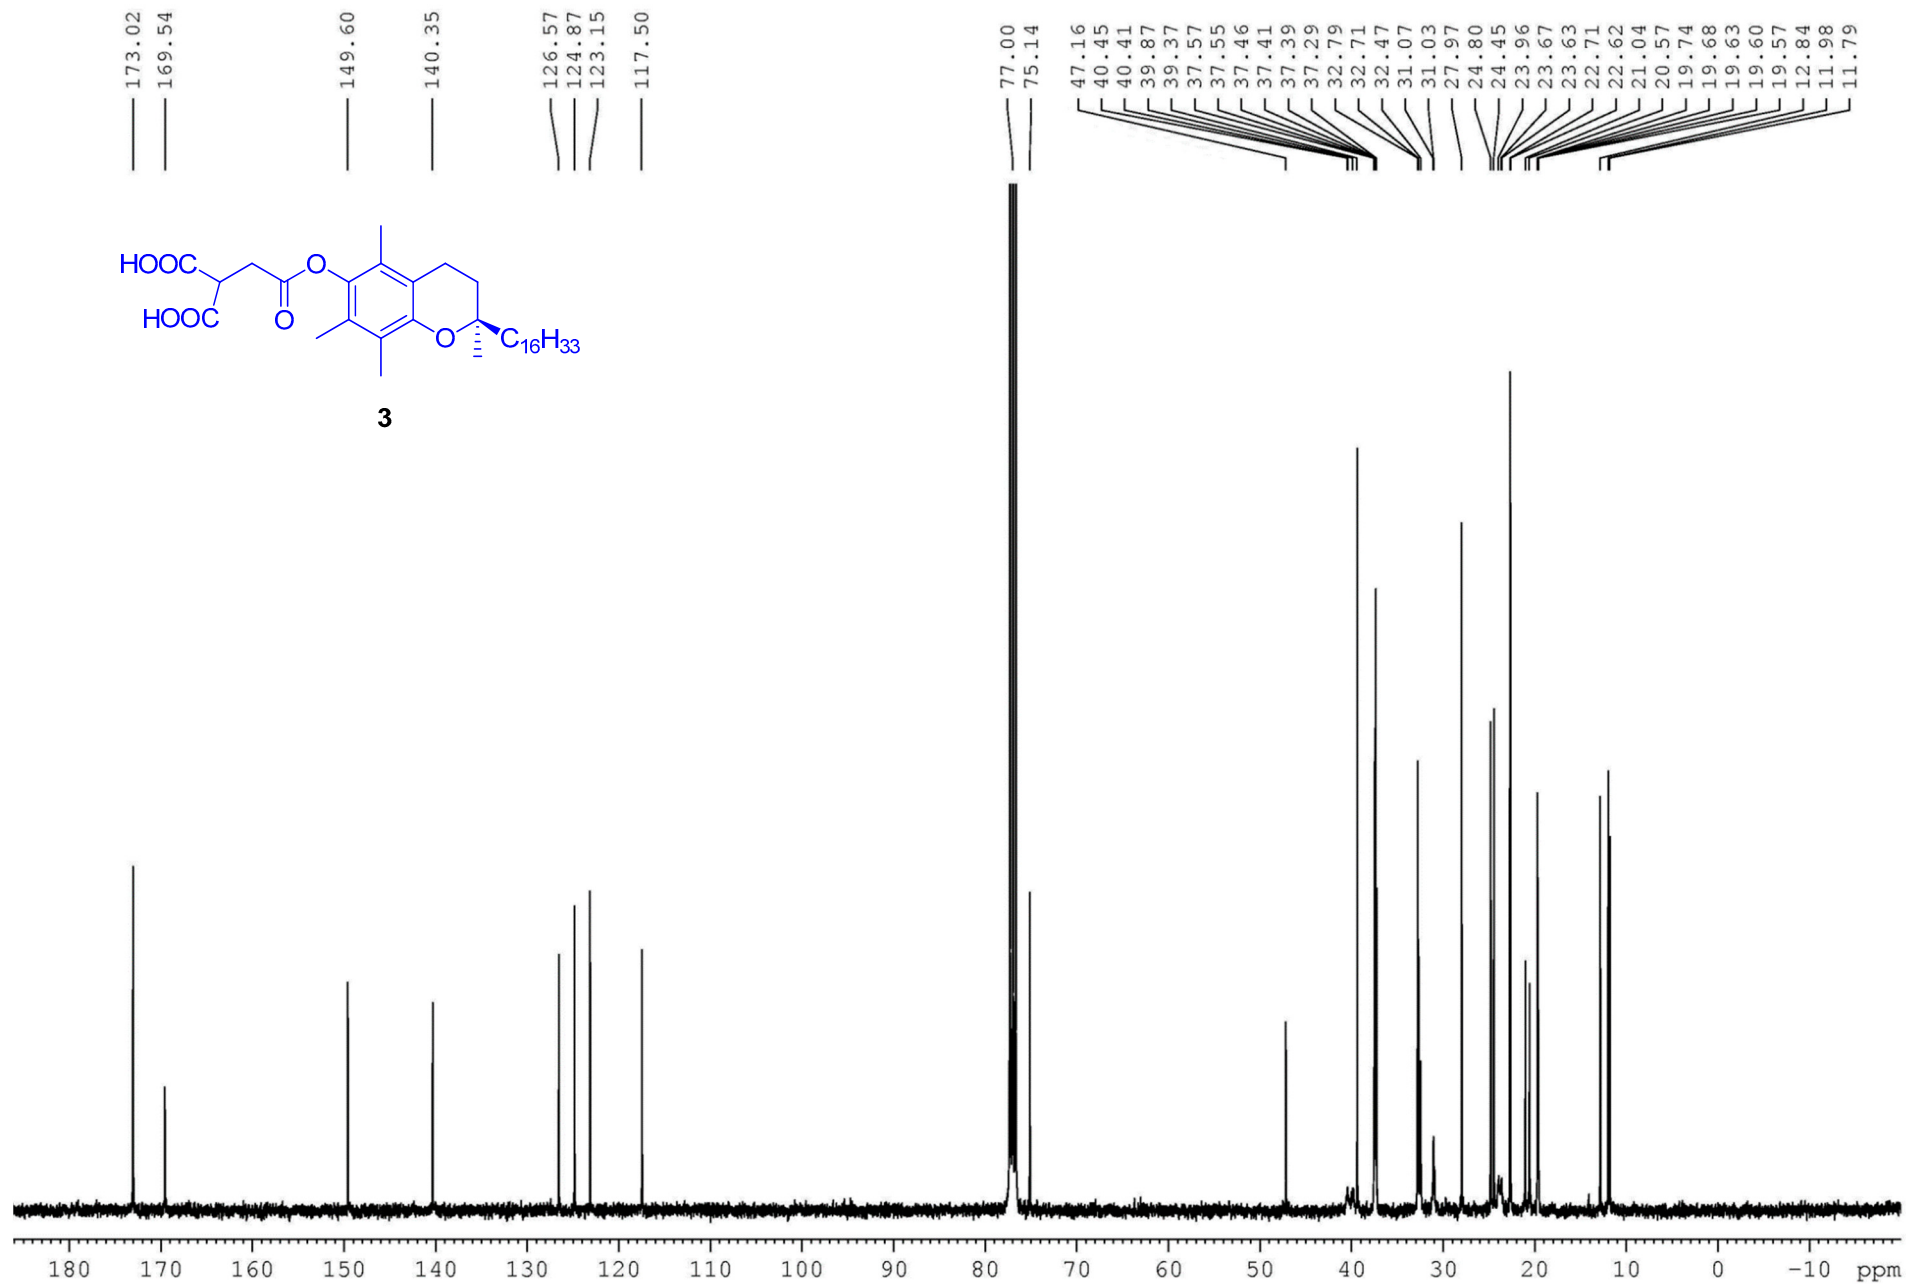

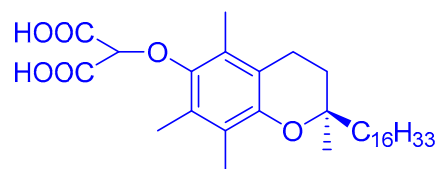

4

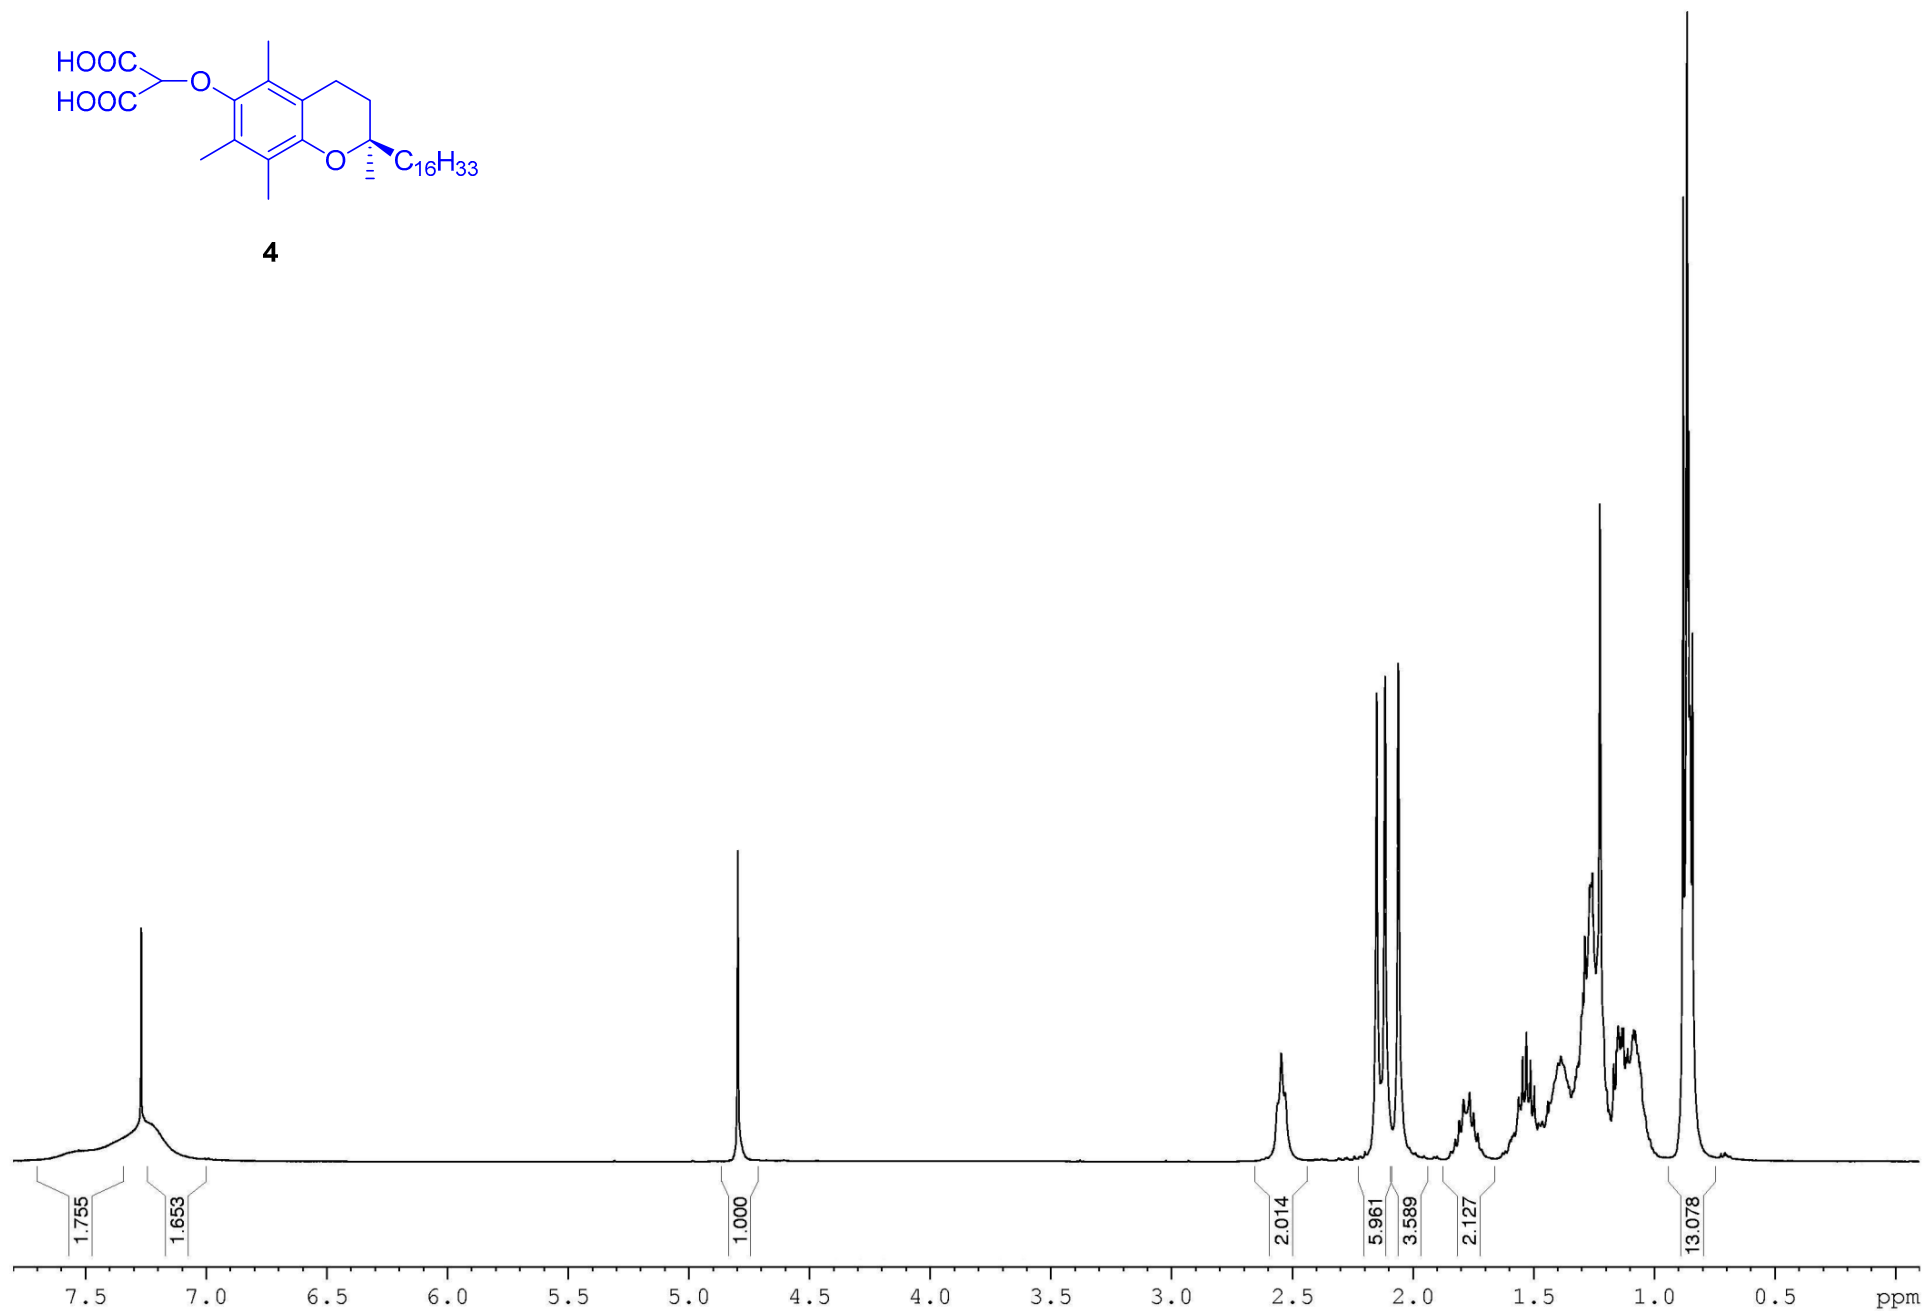

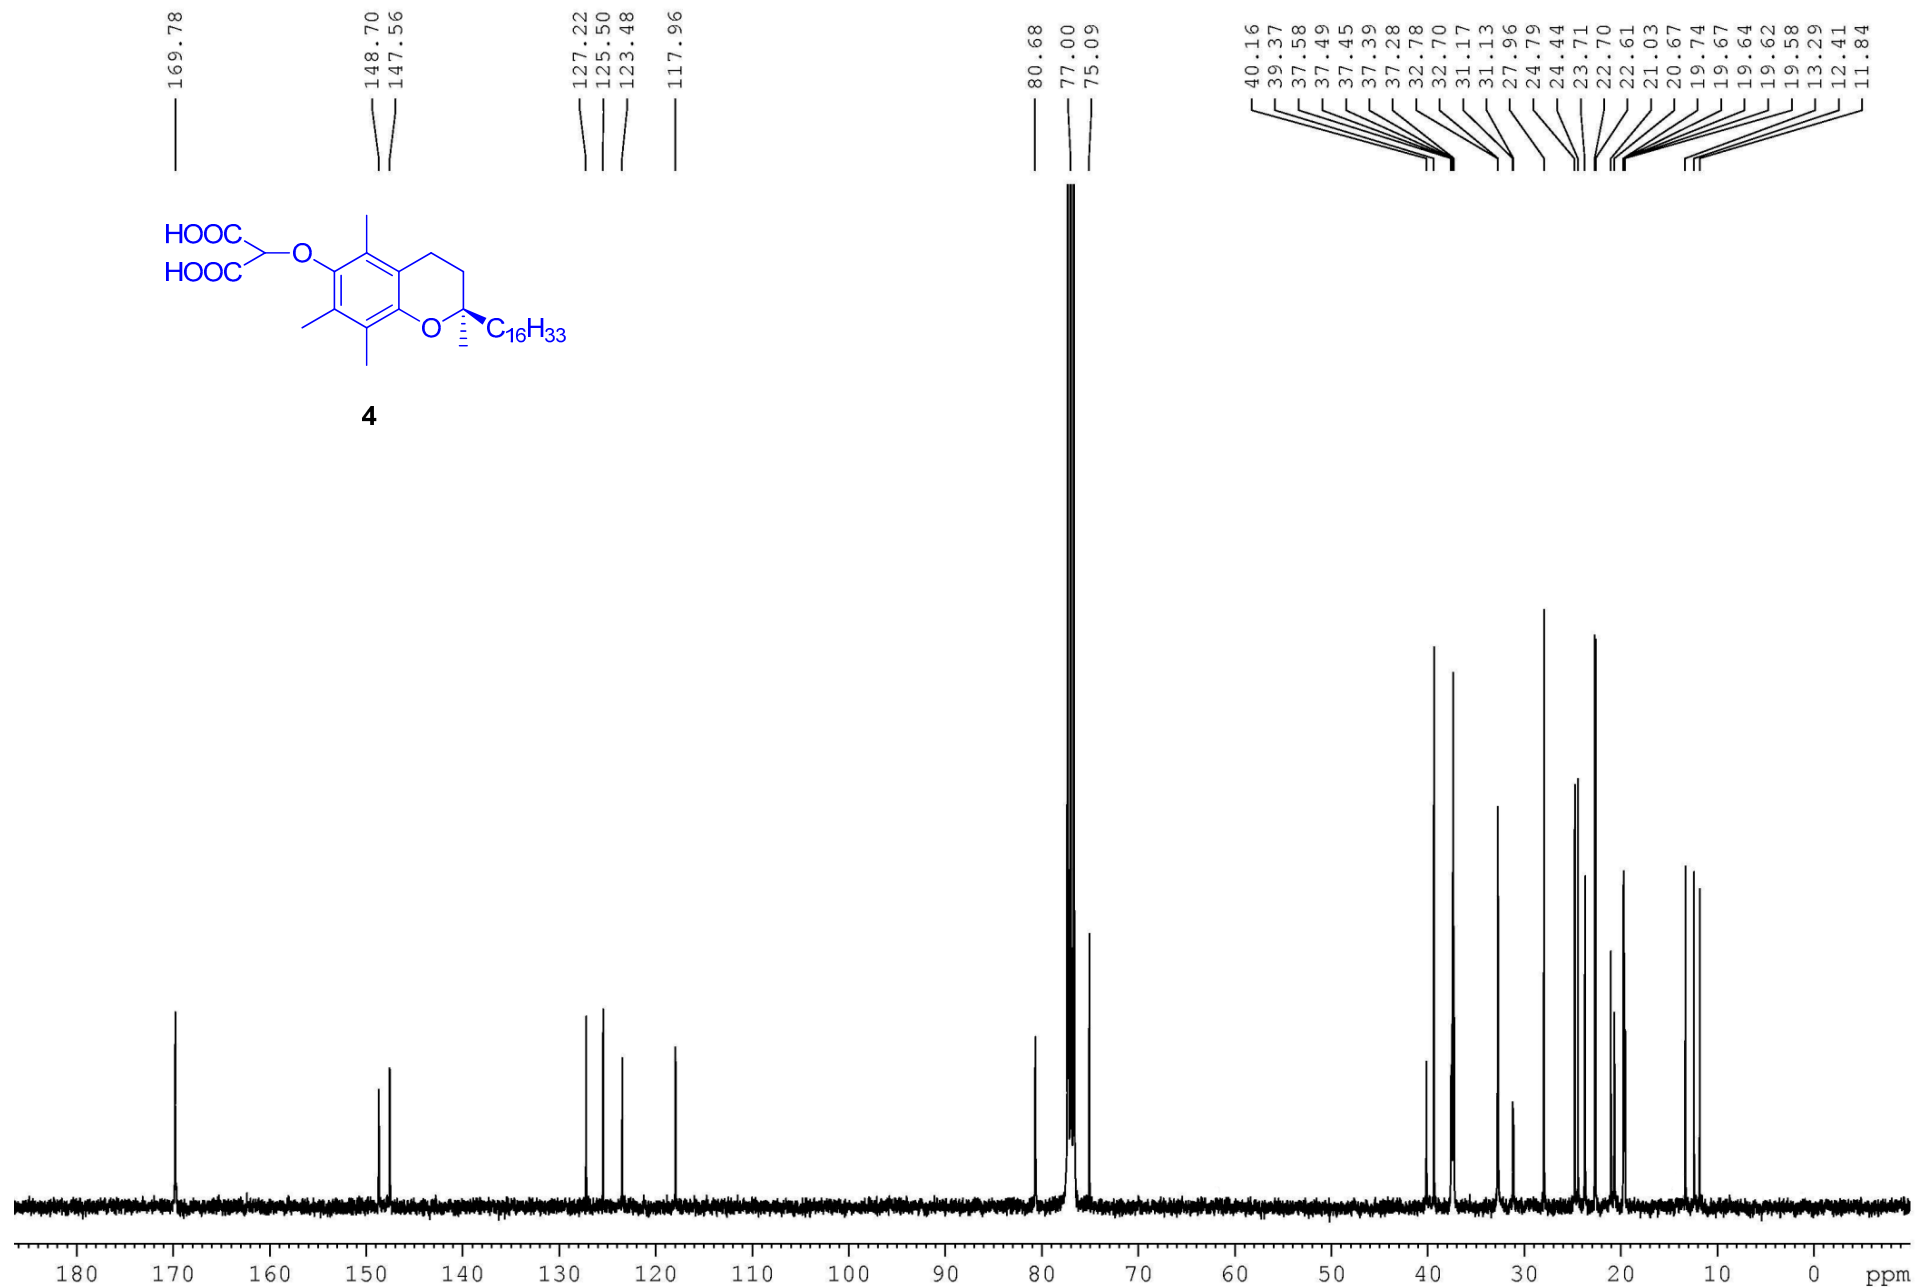

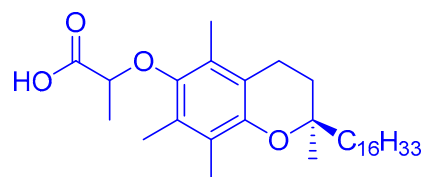

5

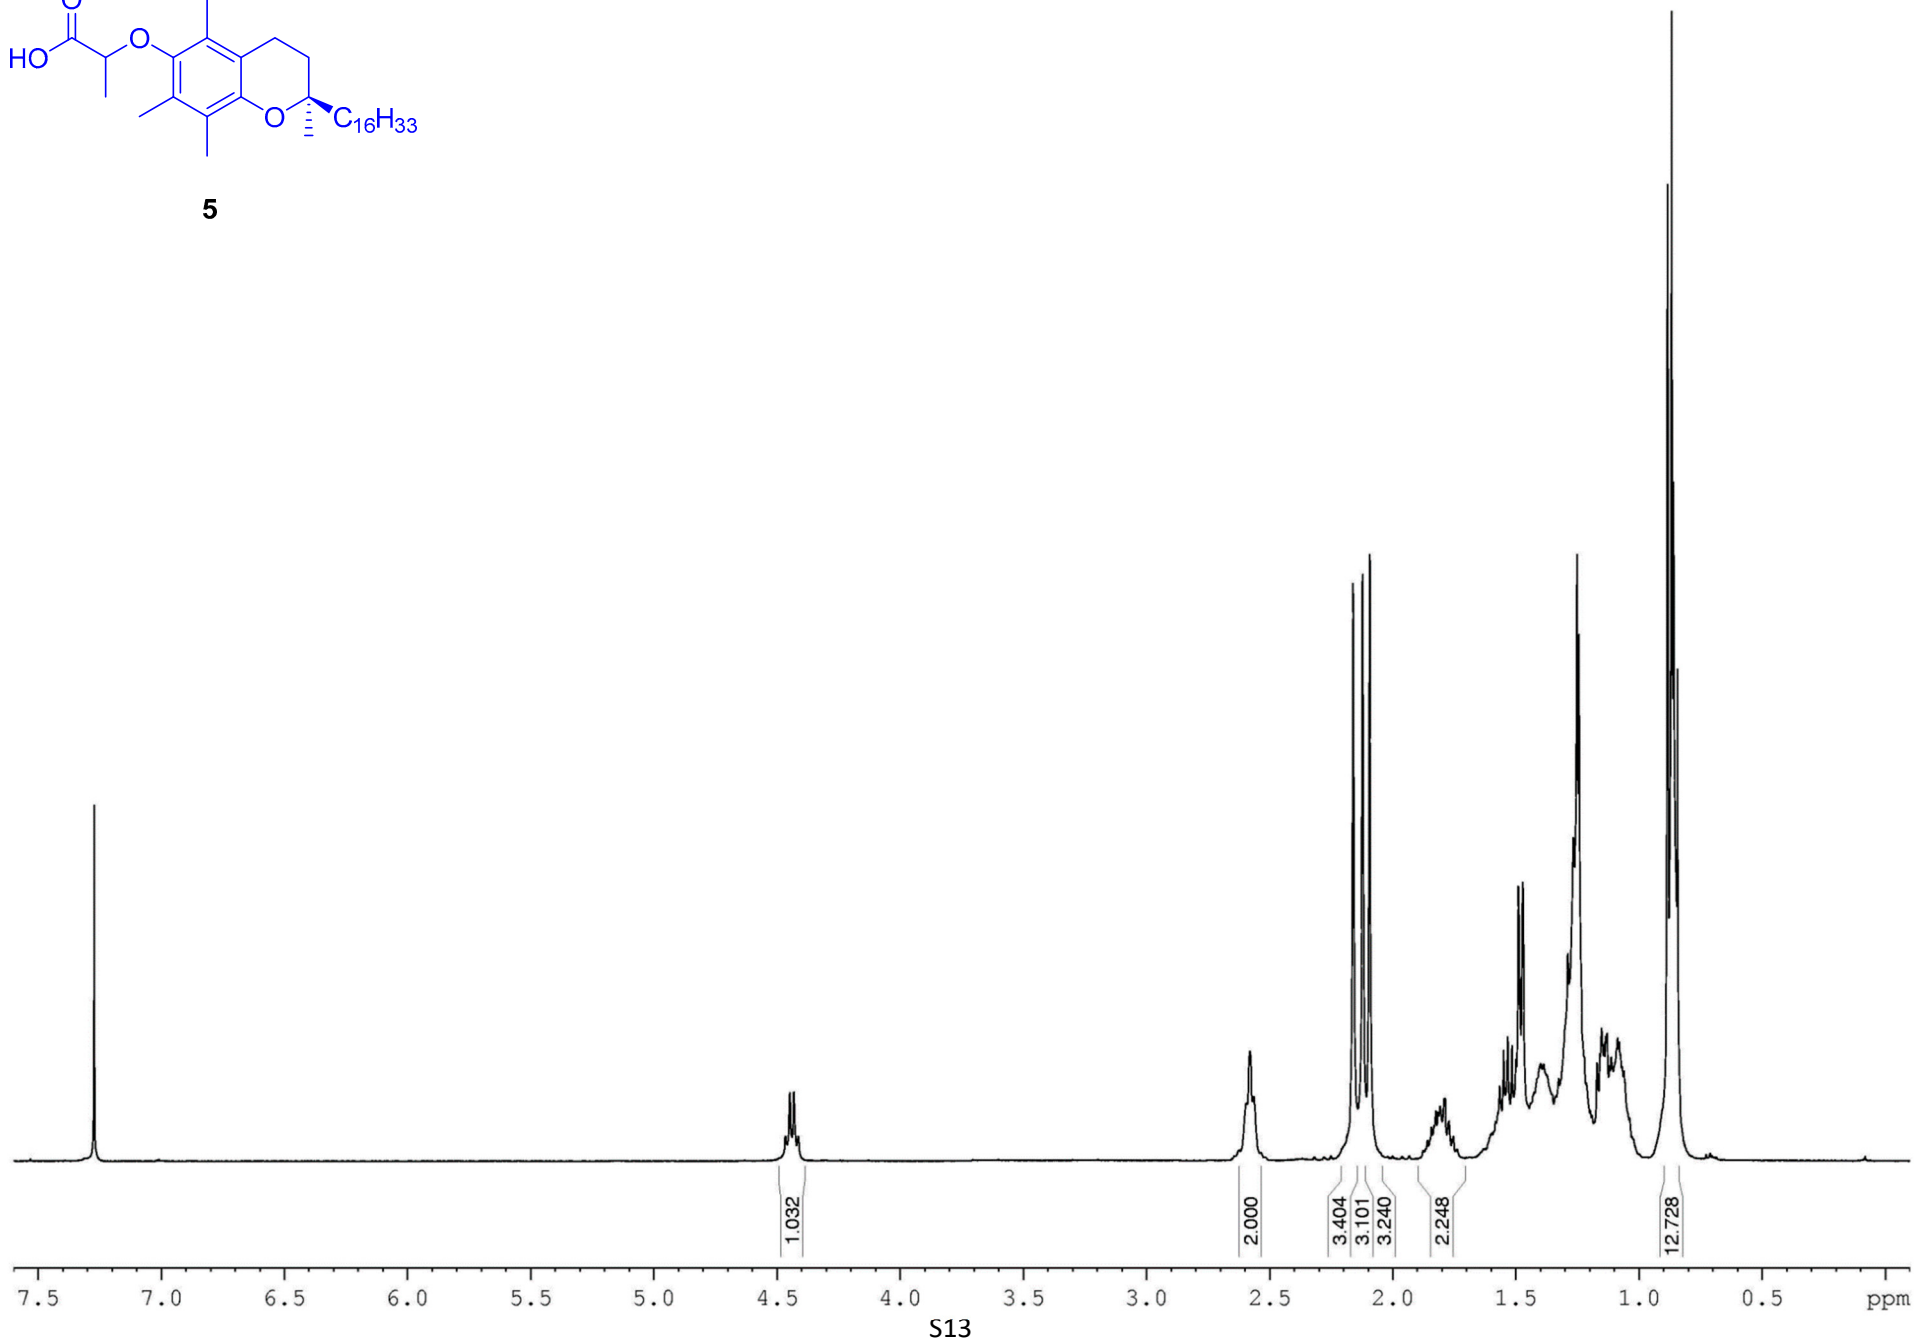

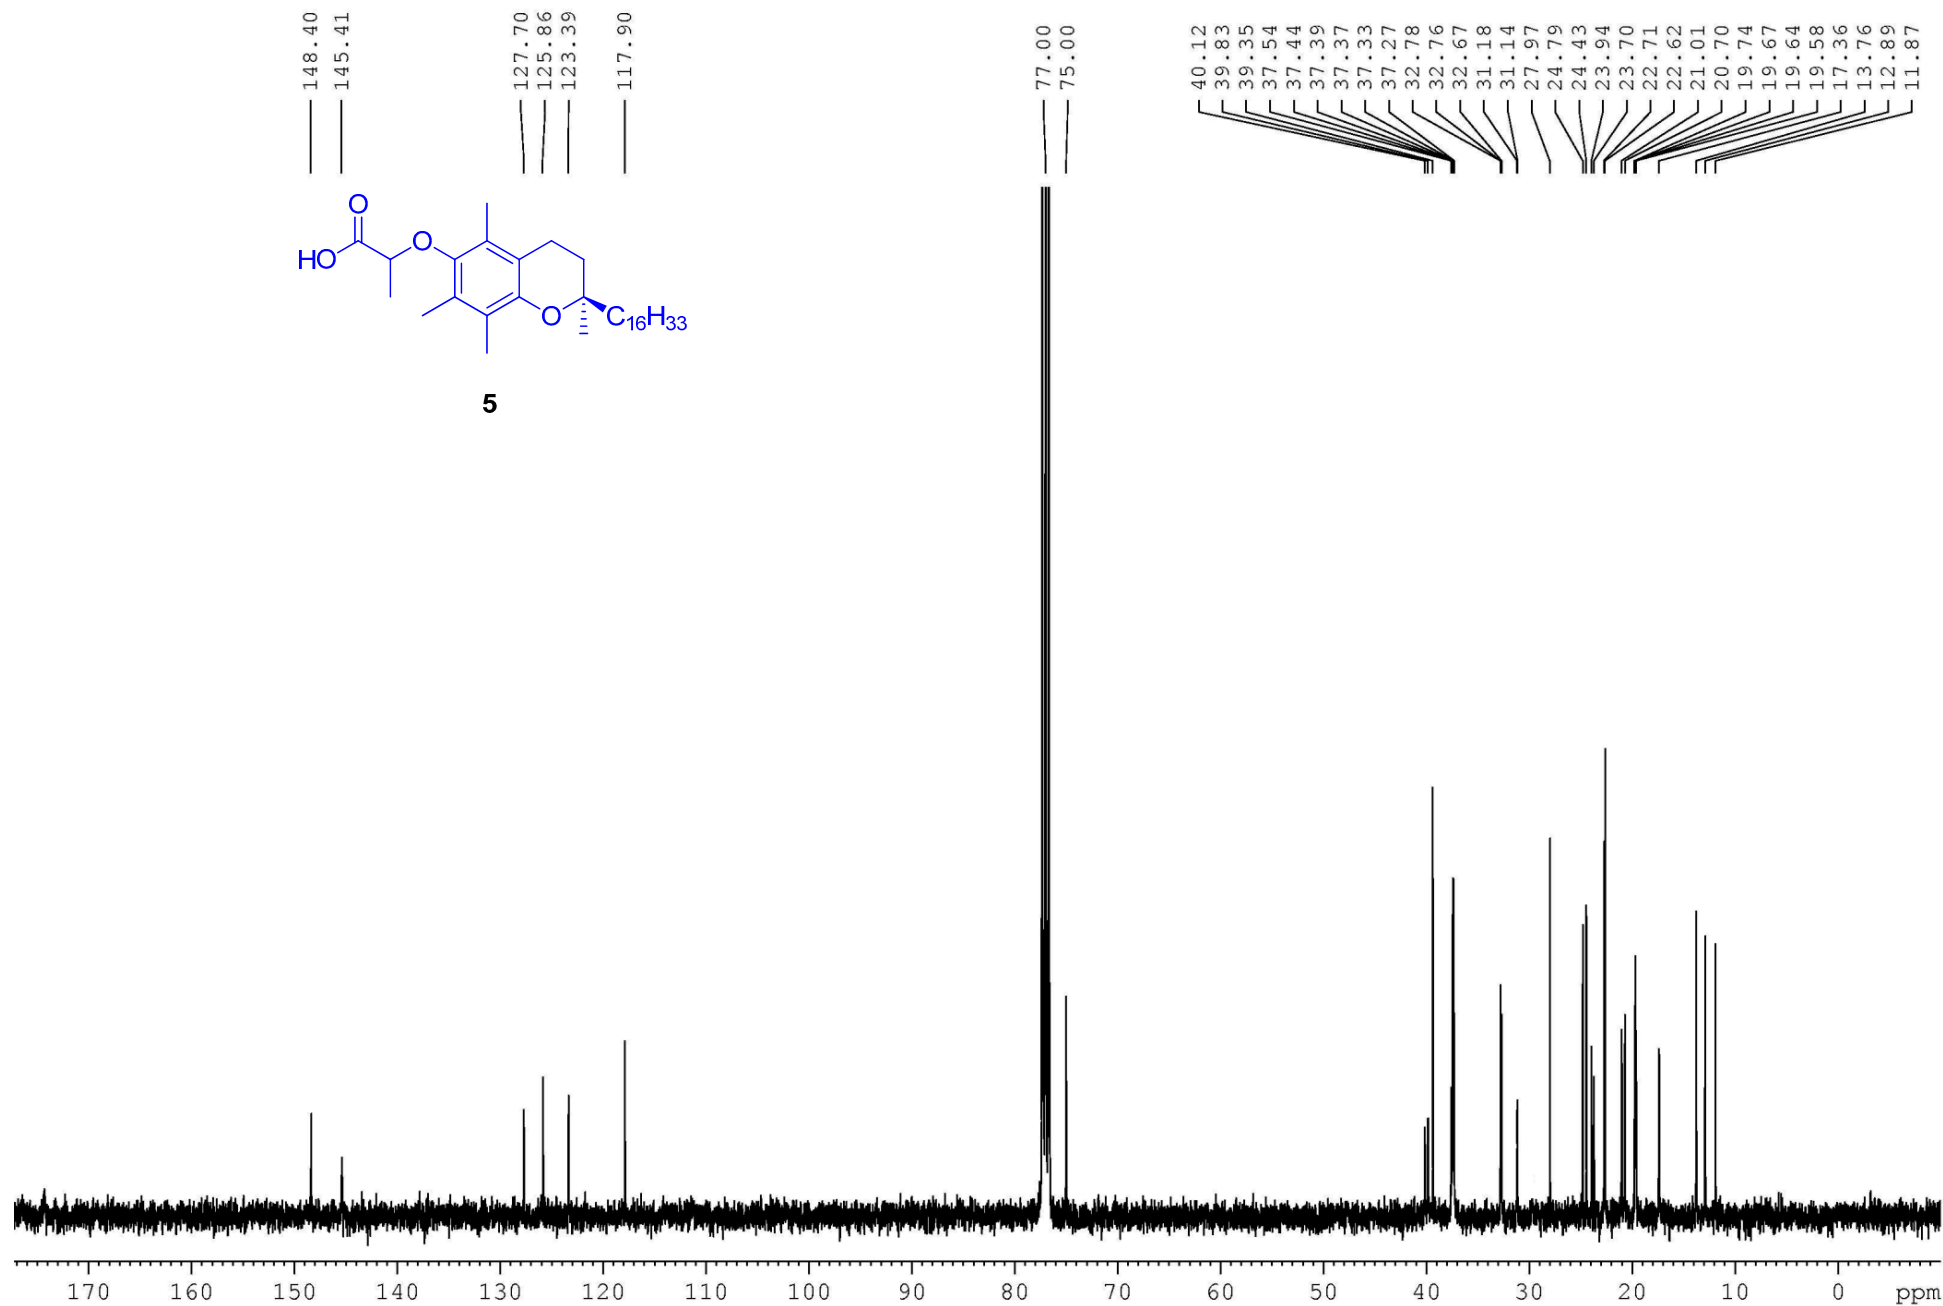

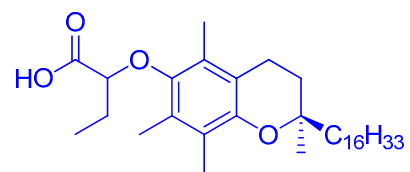

**6**

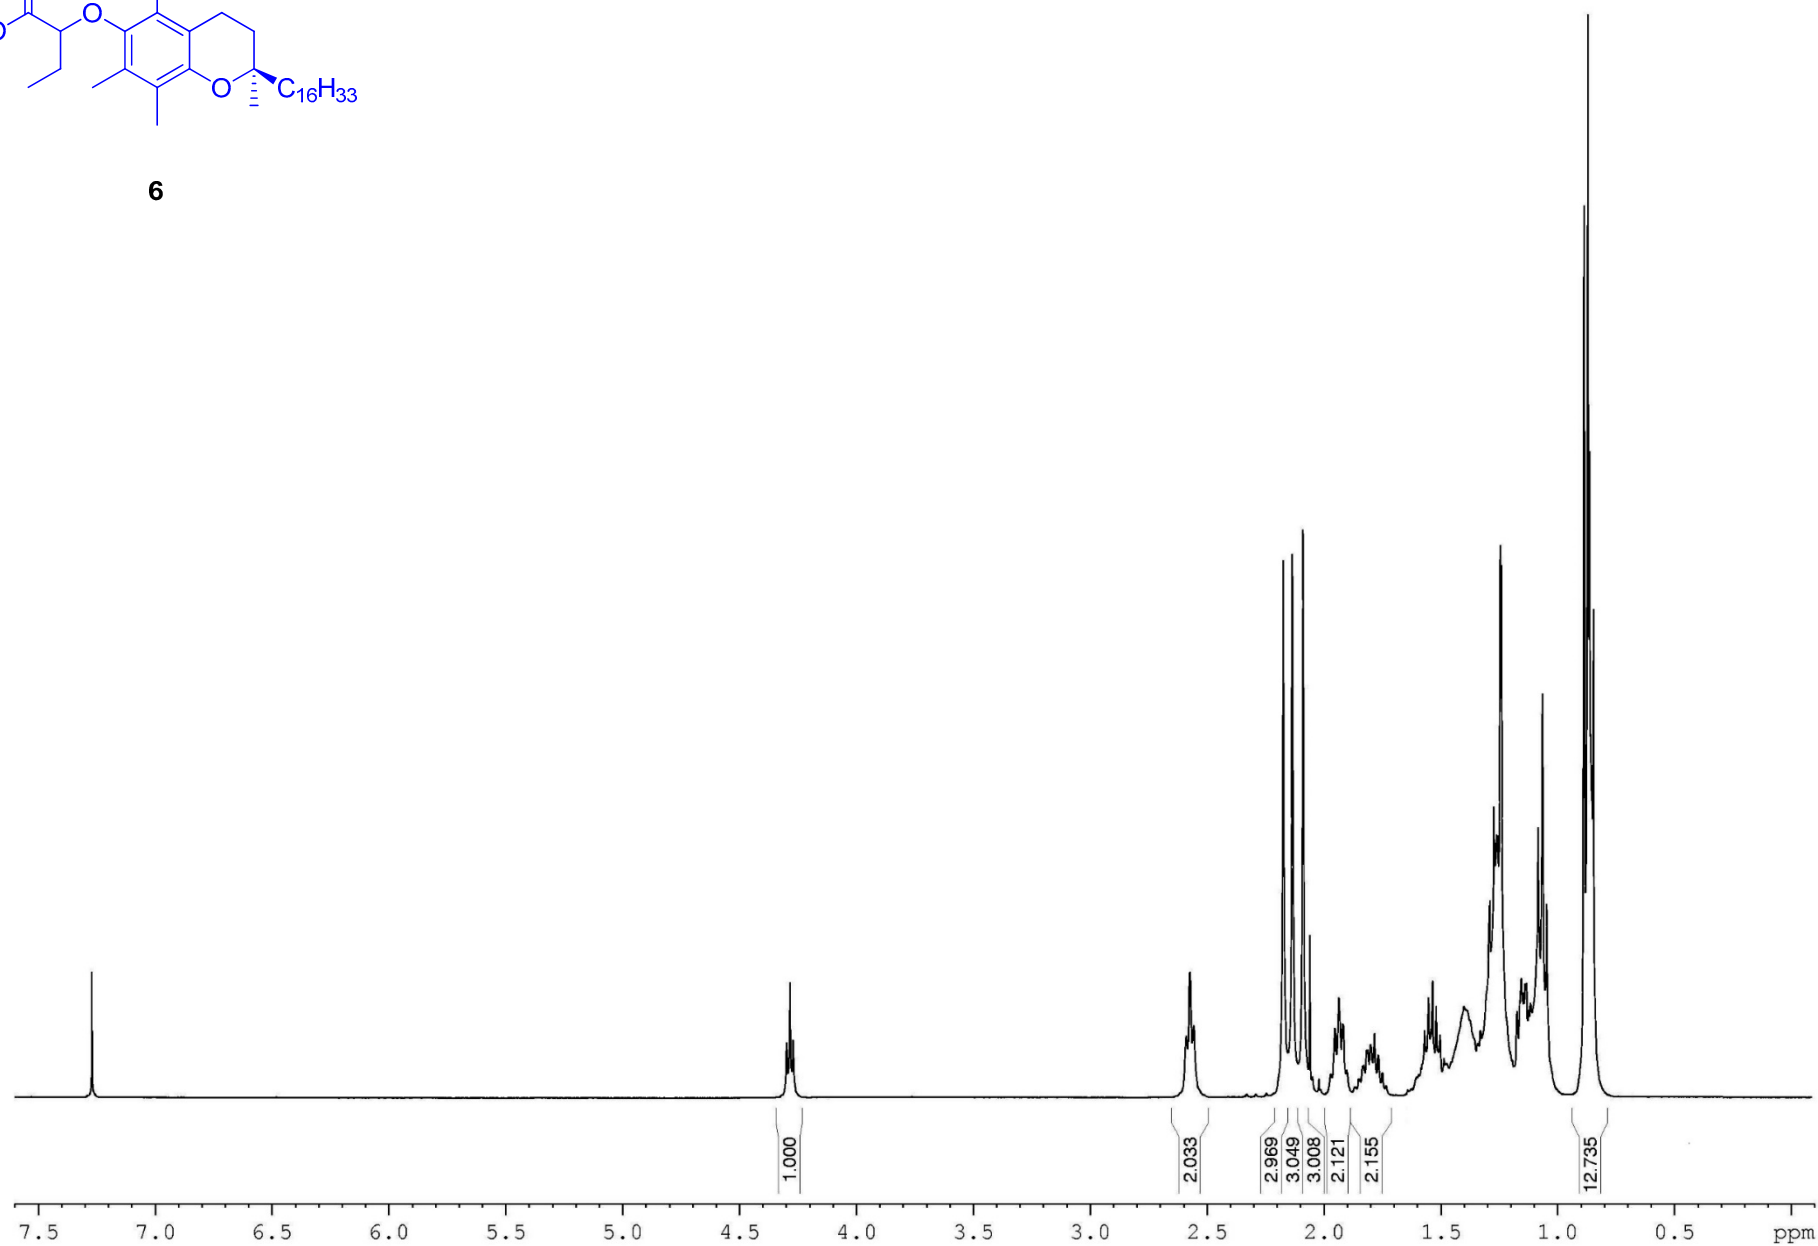

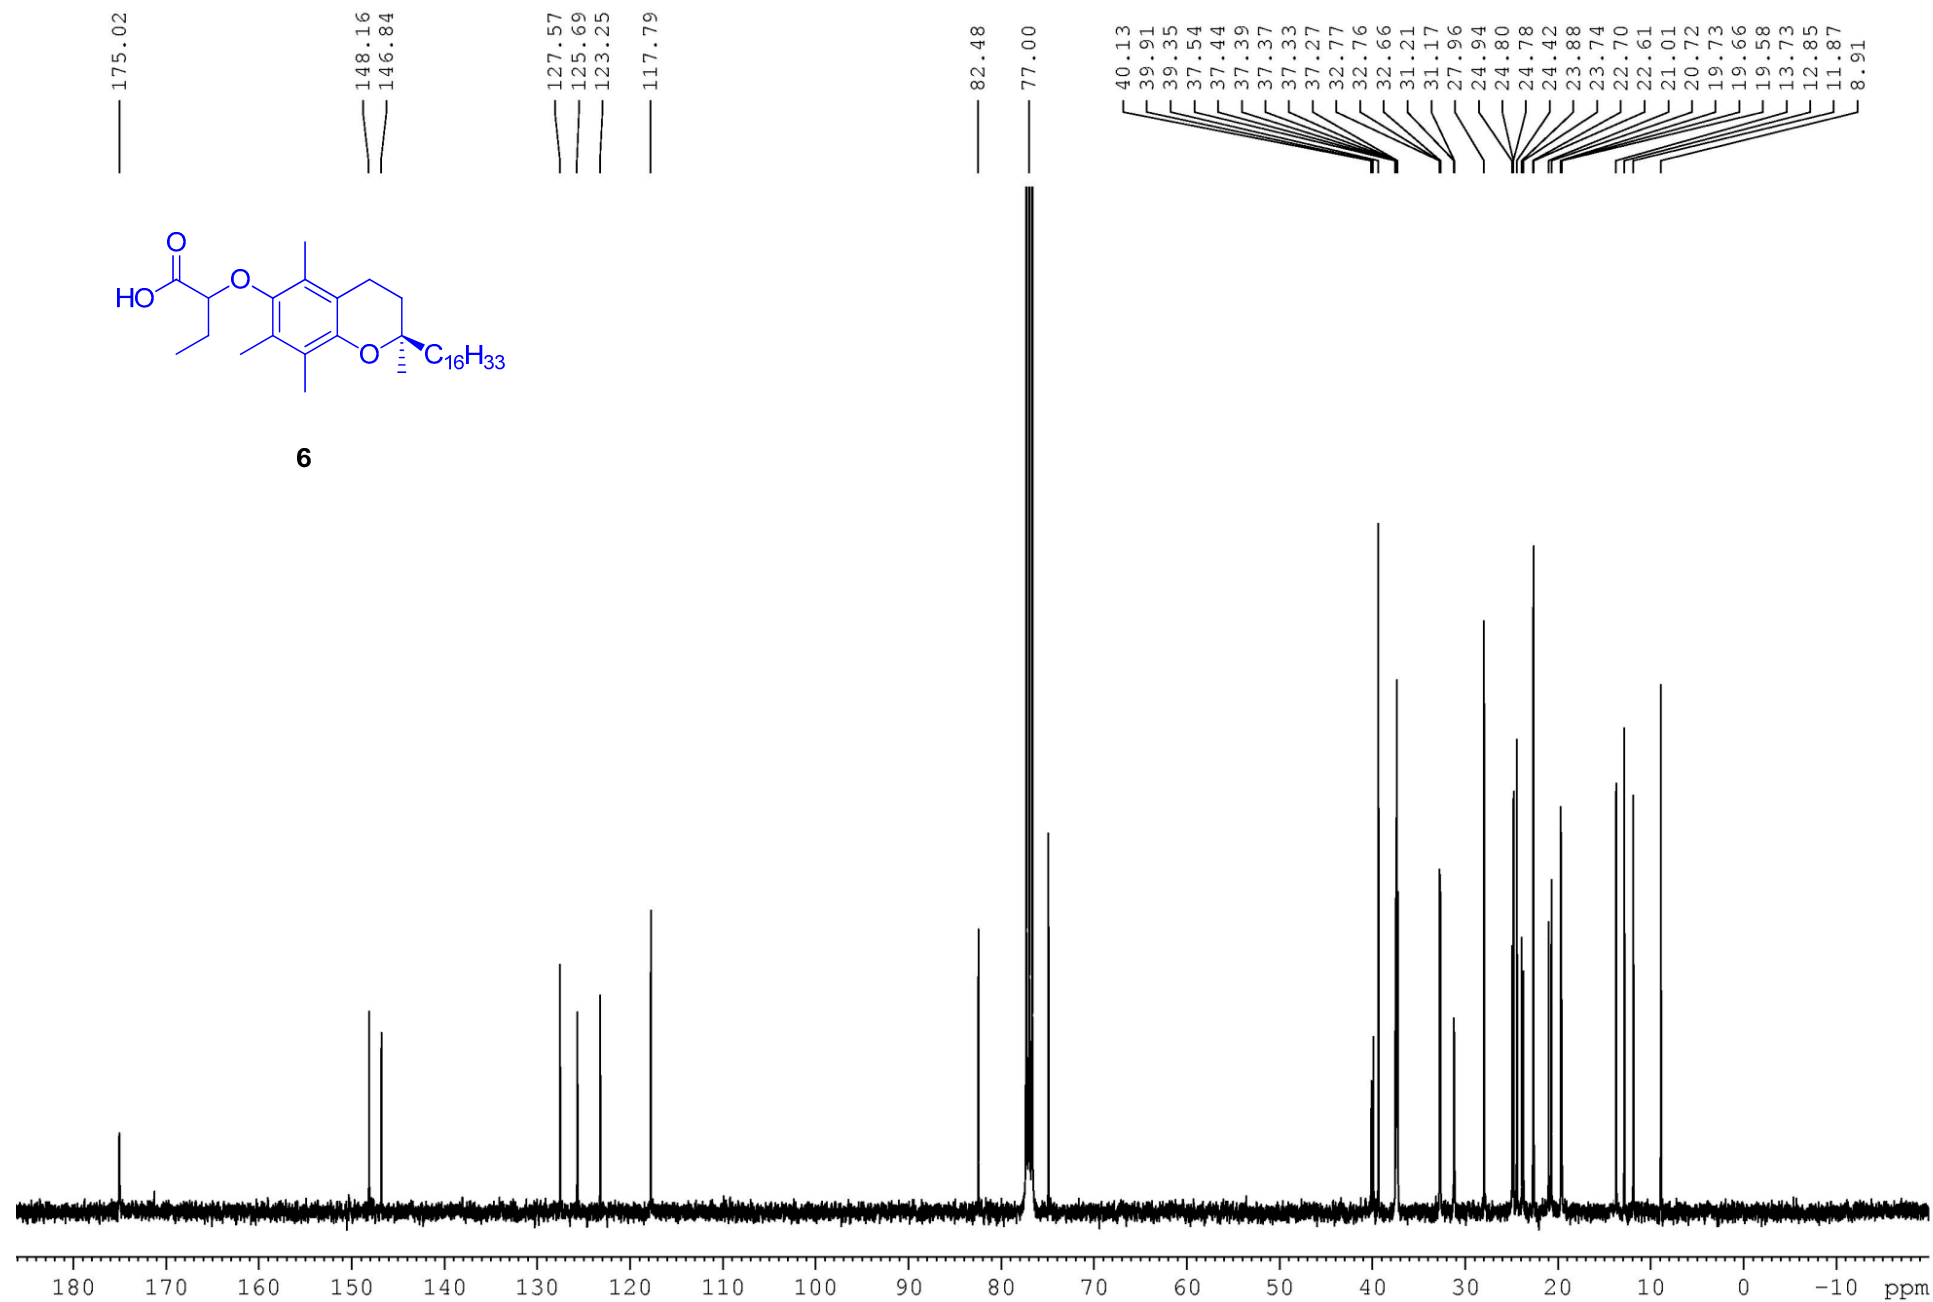

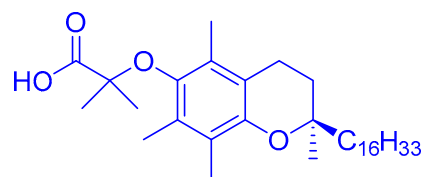

7

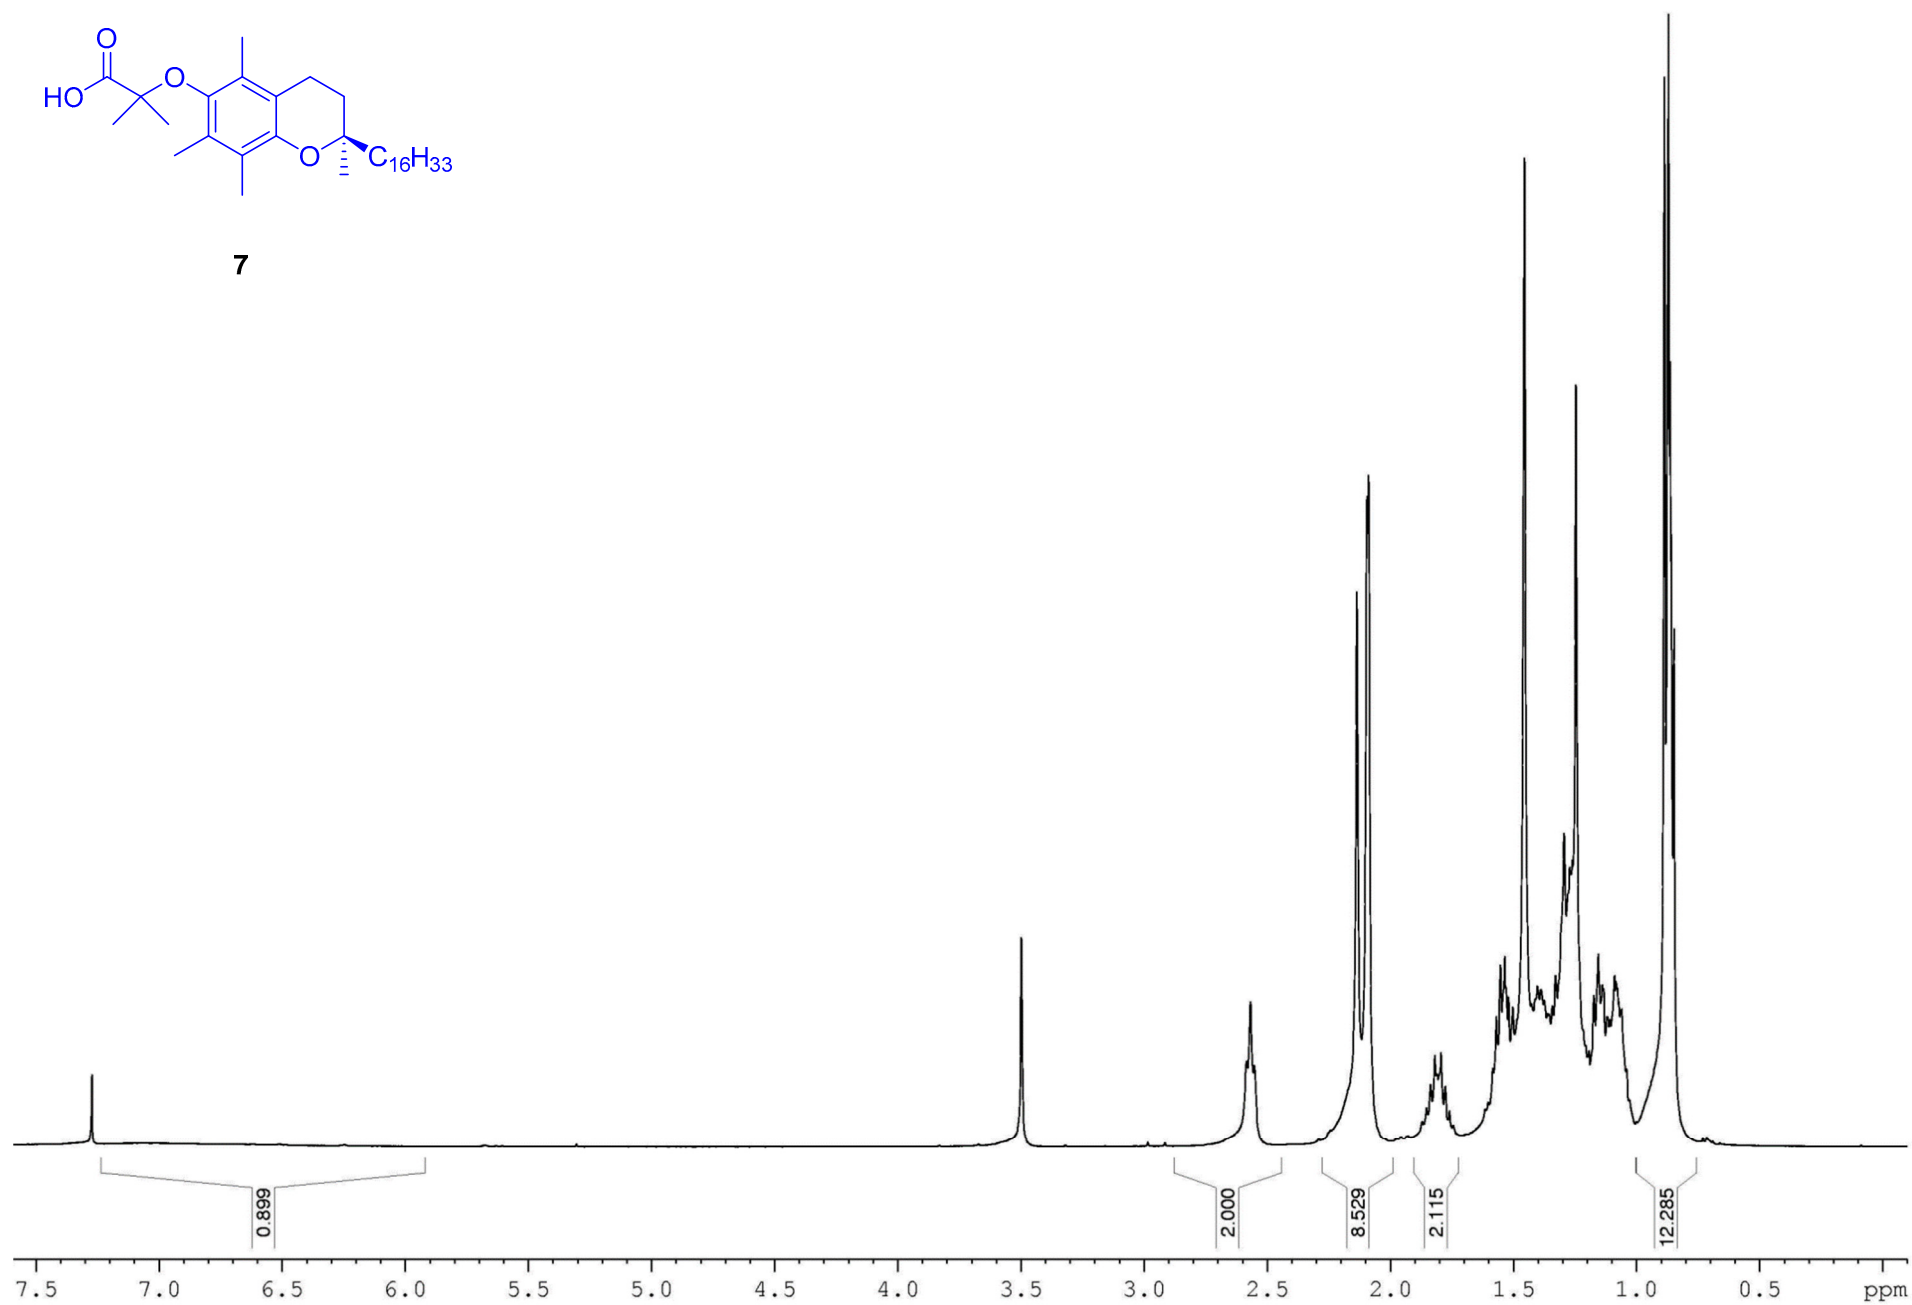

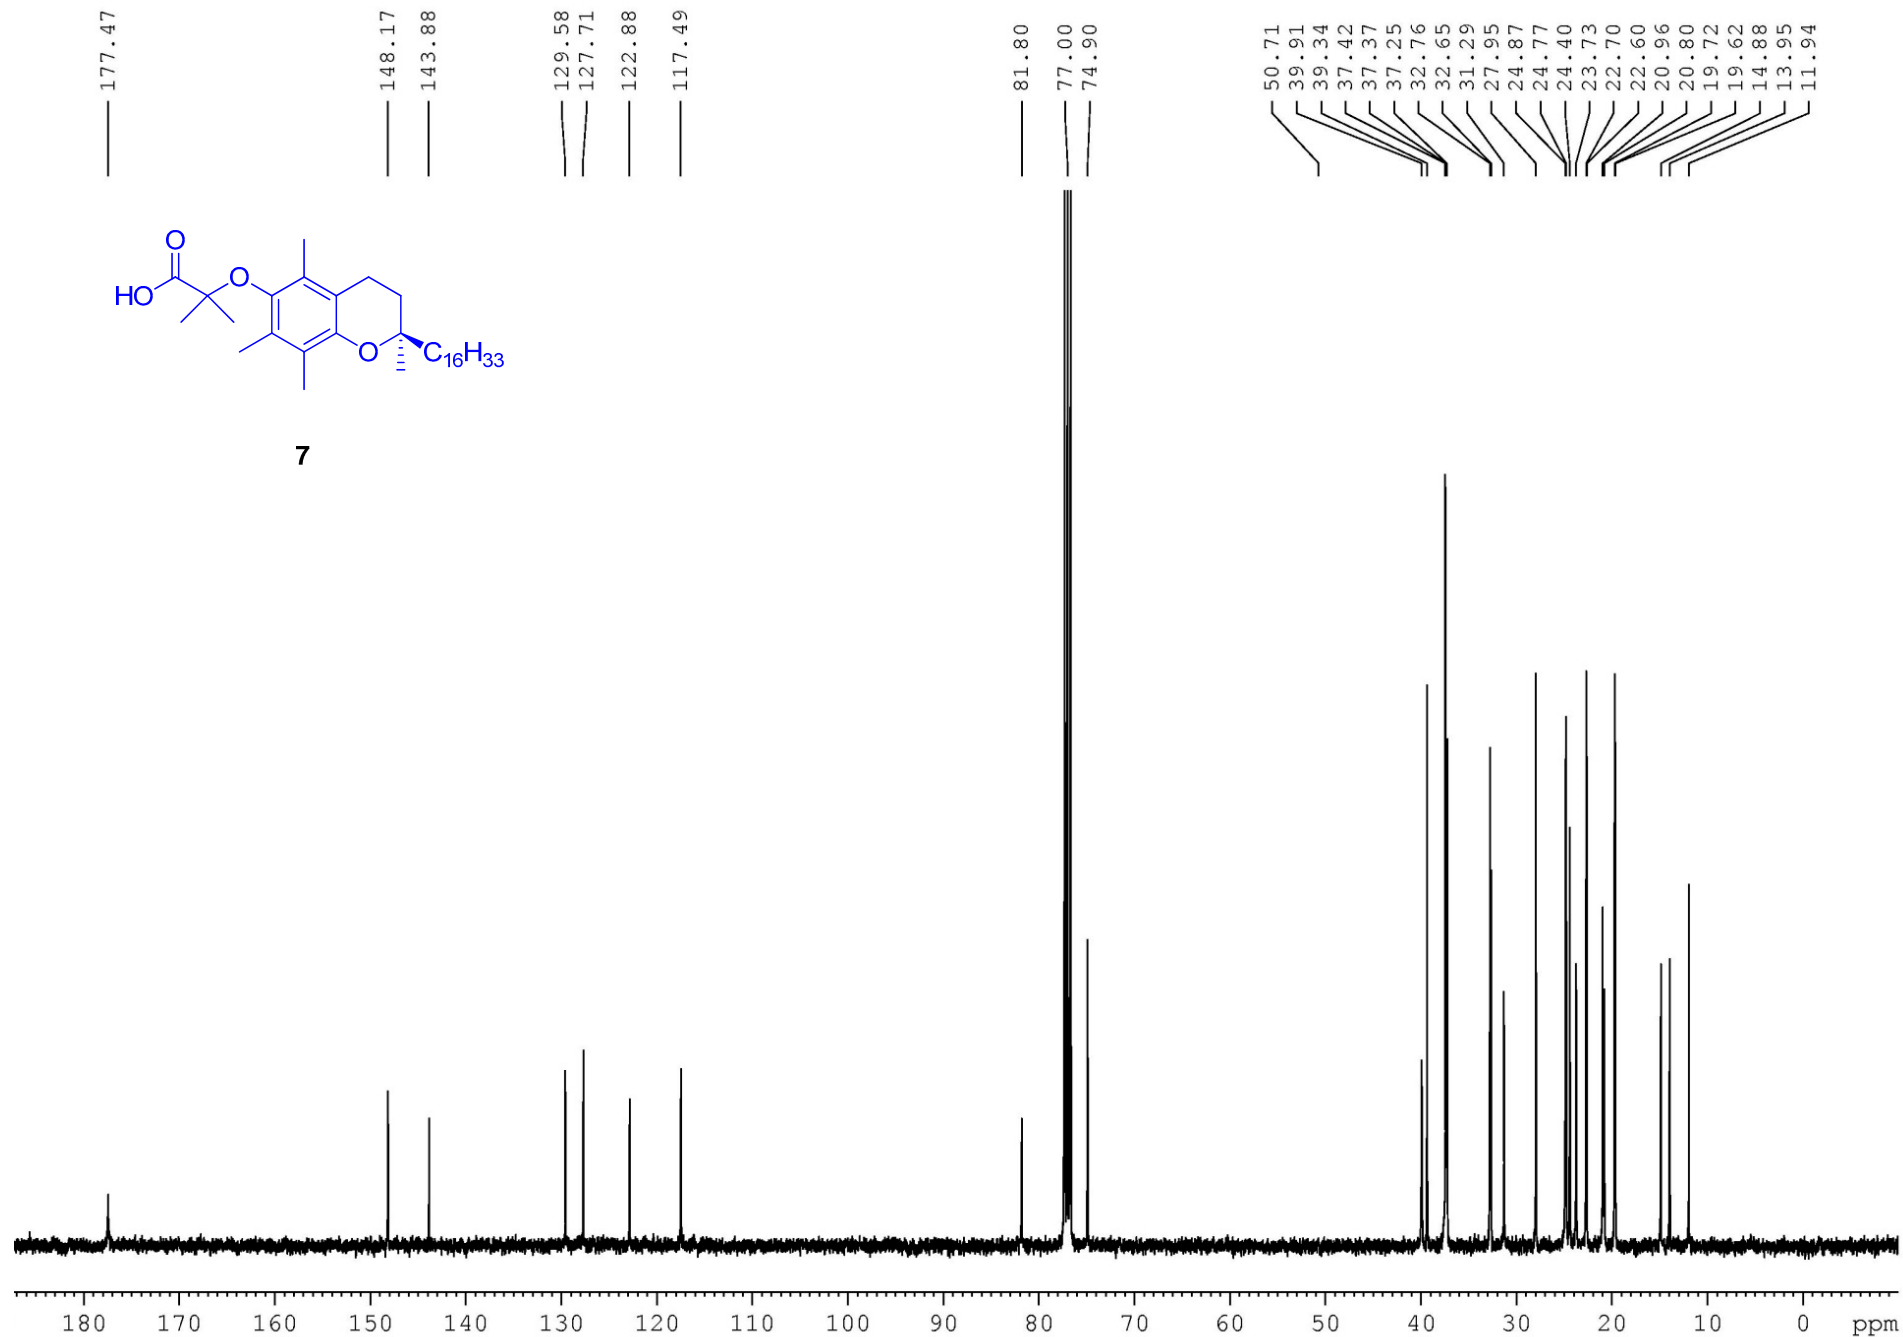

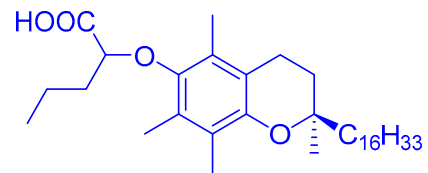

8

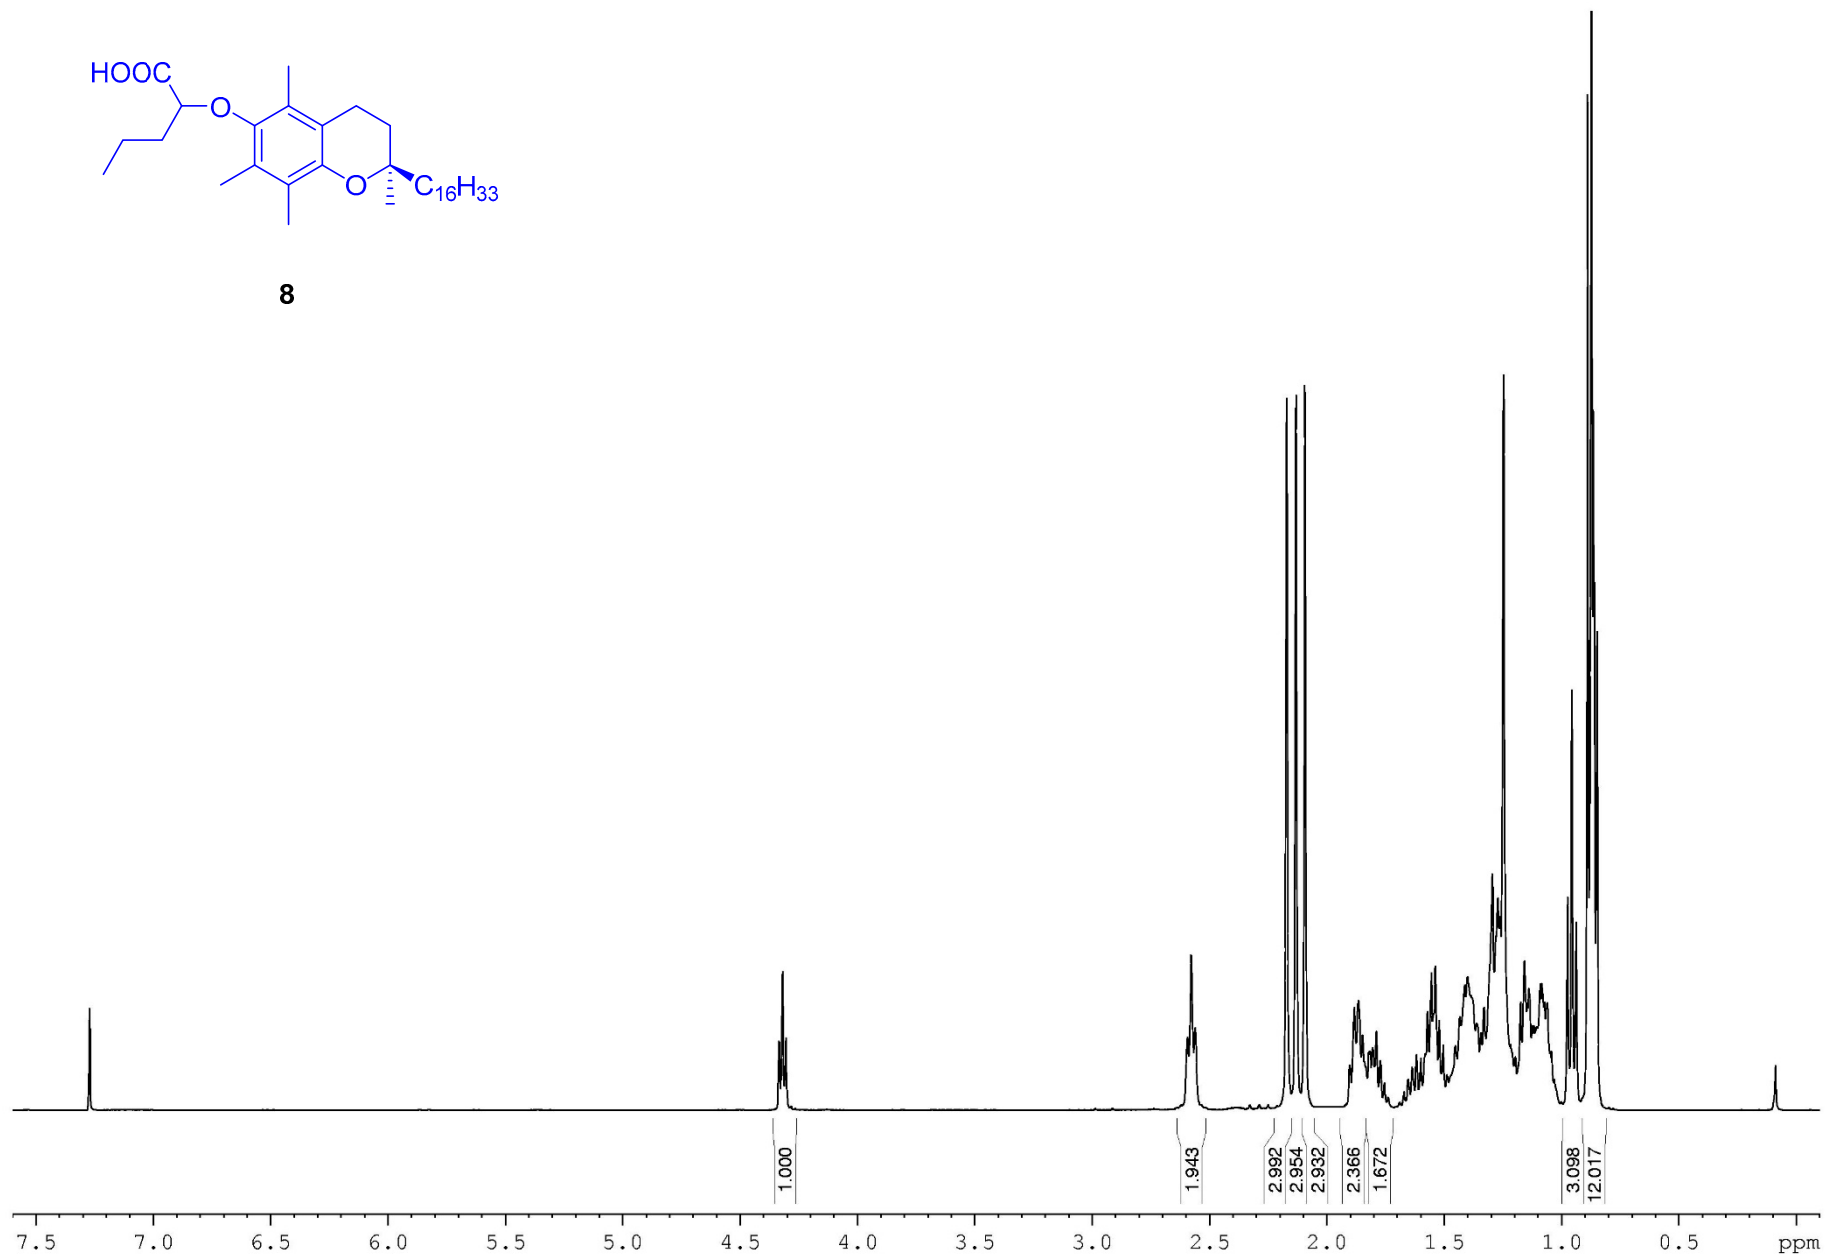

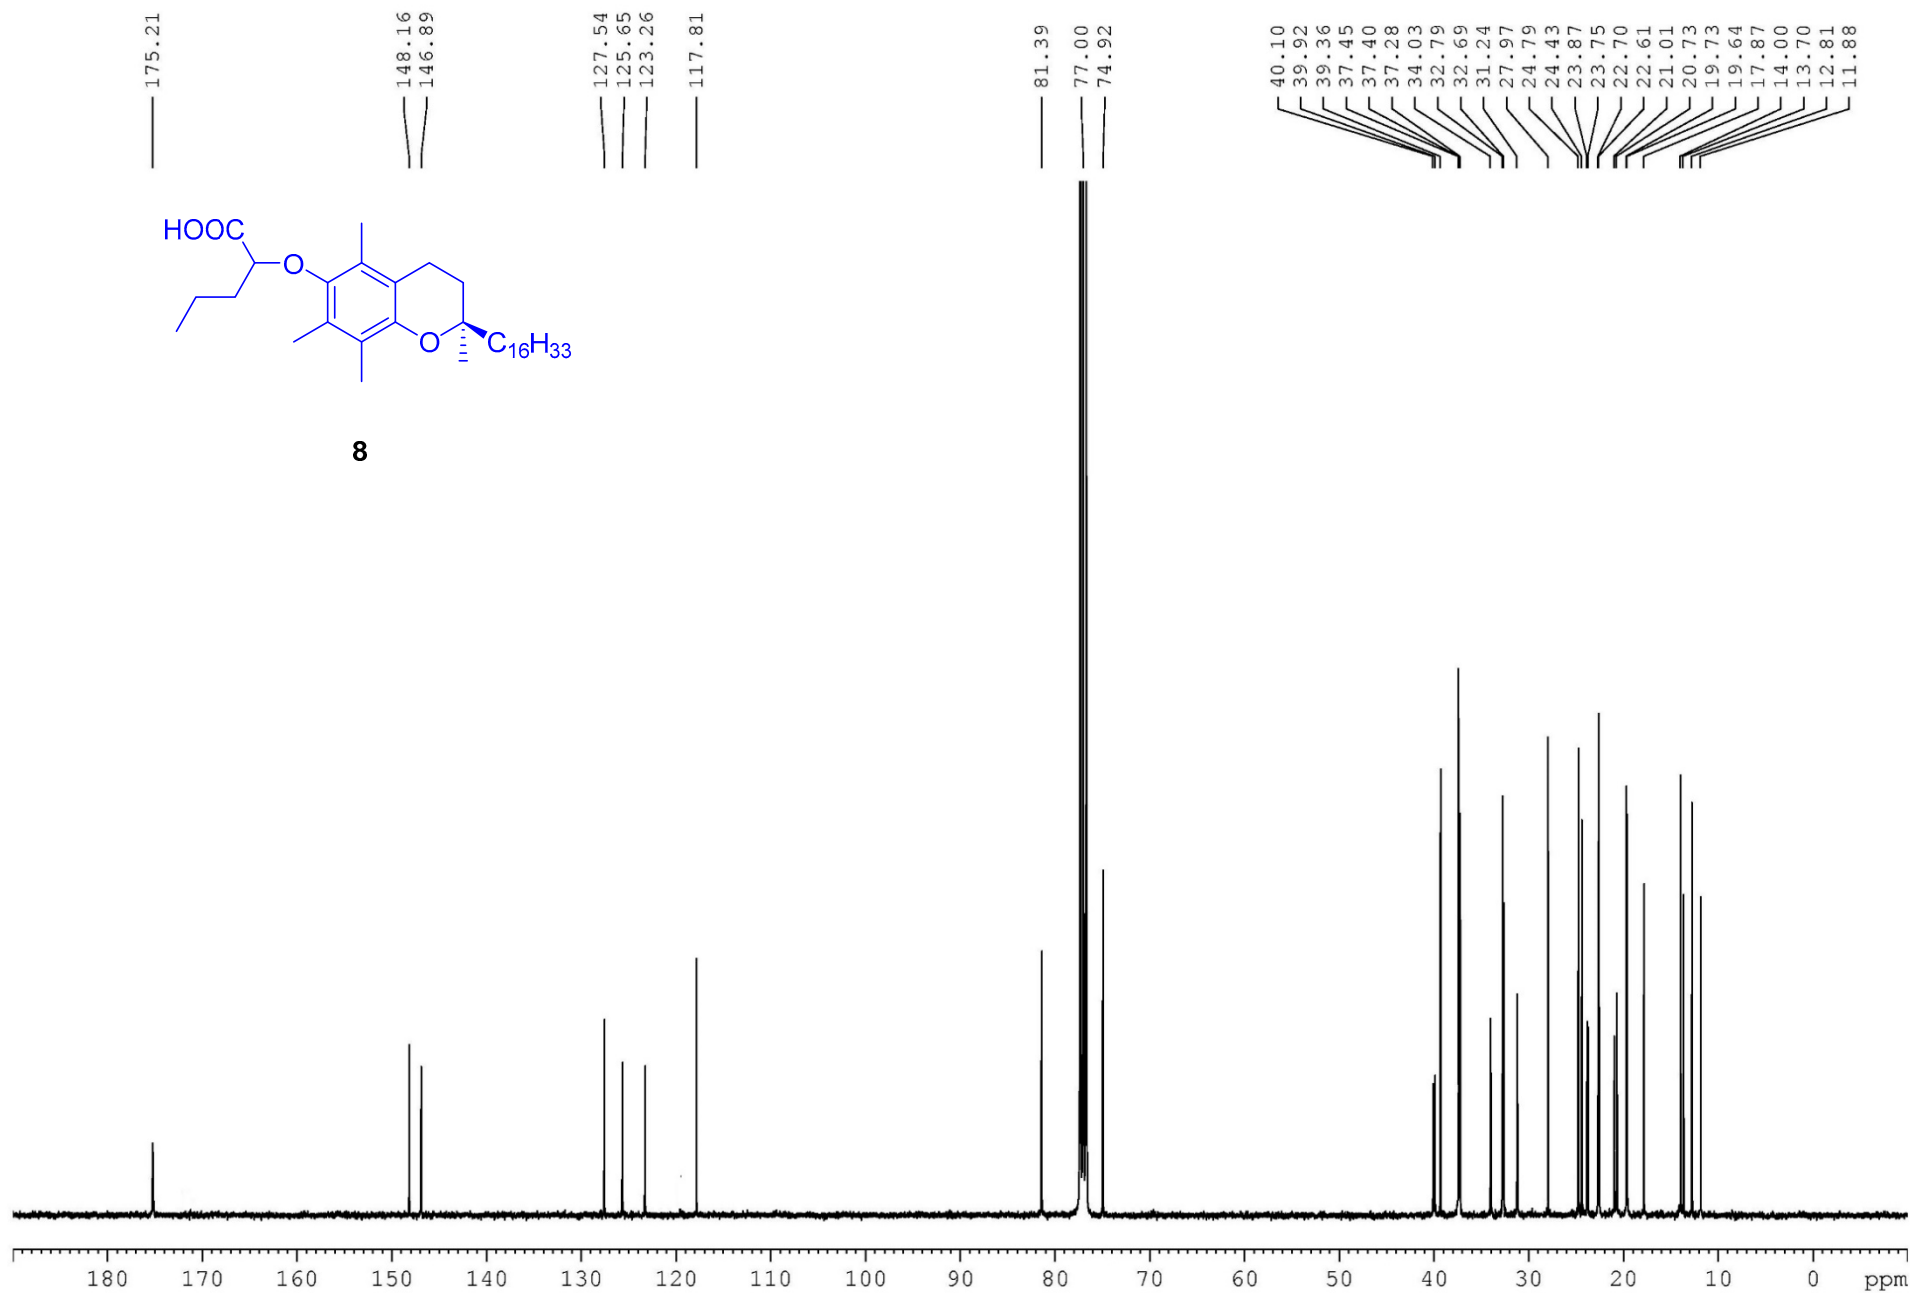

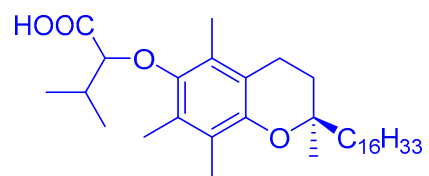

9

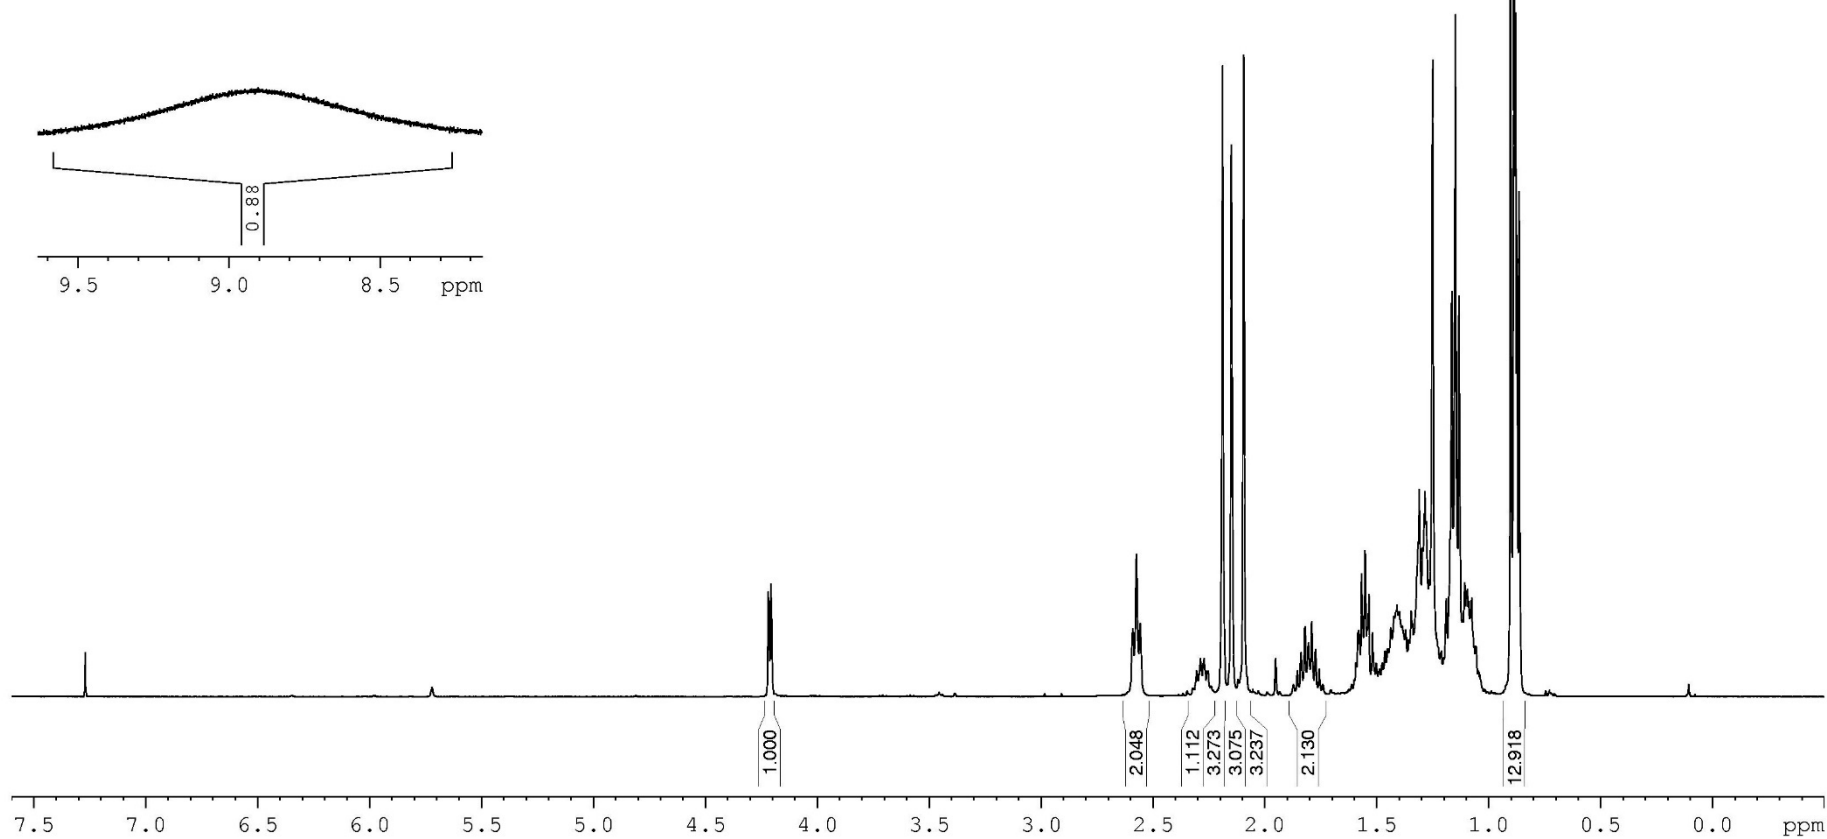

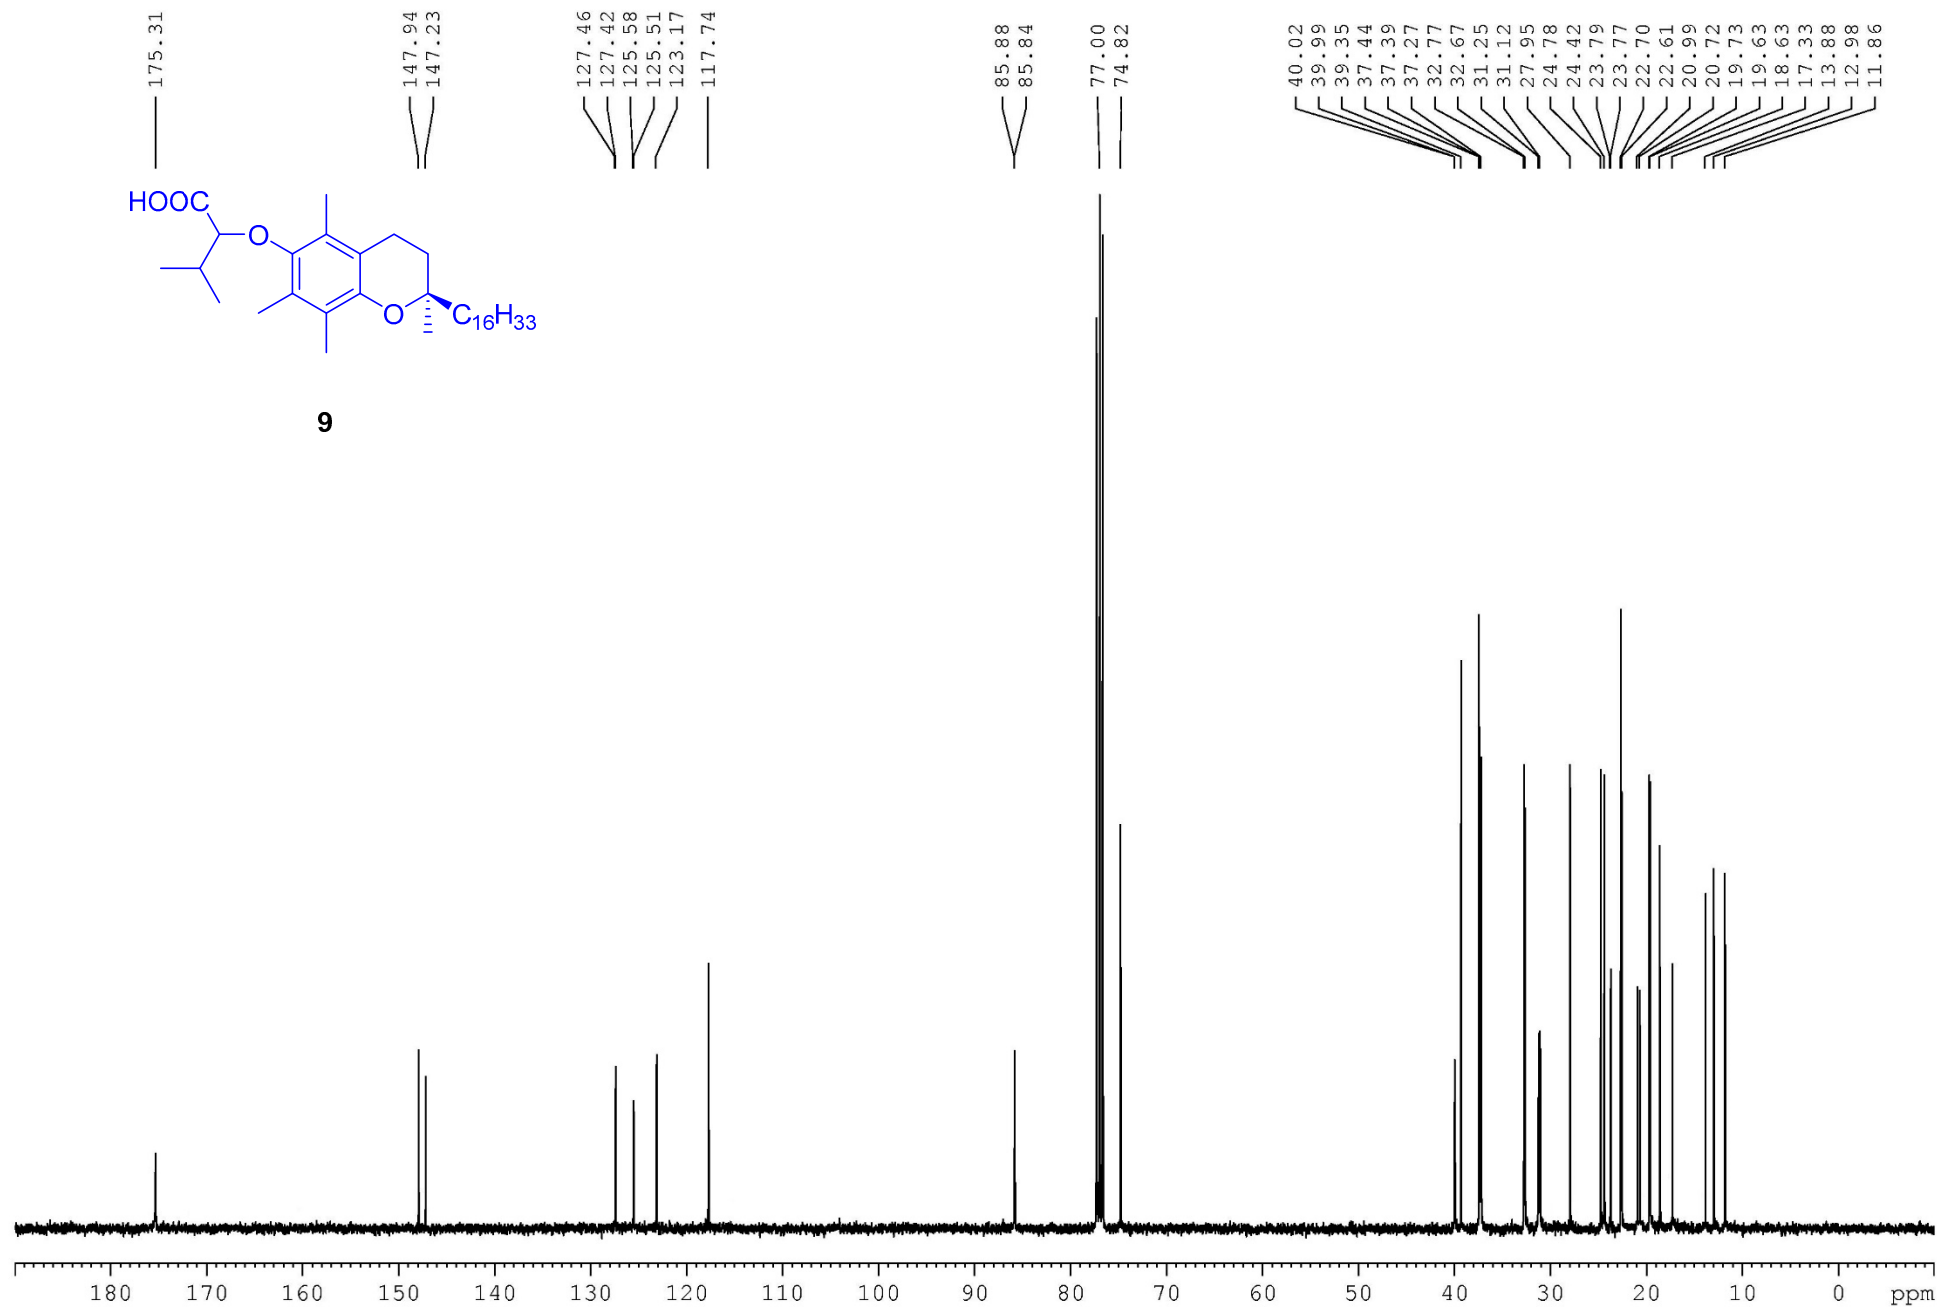

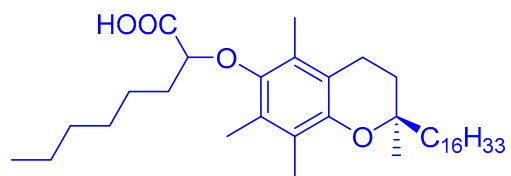

10

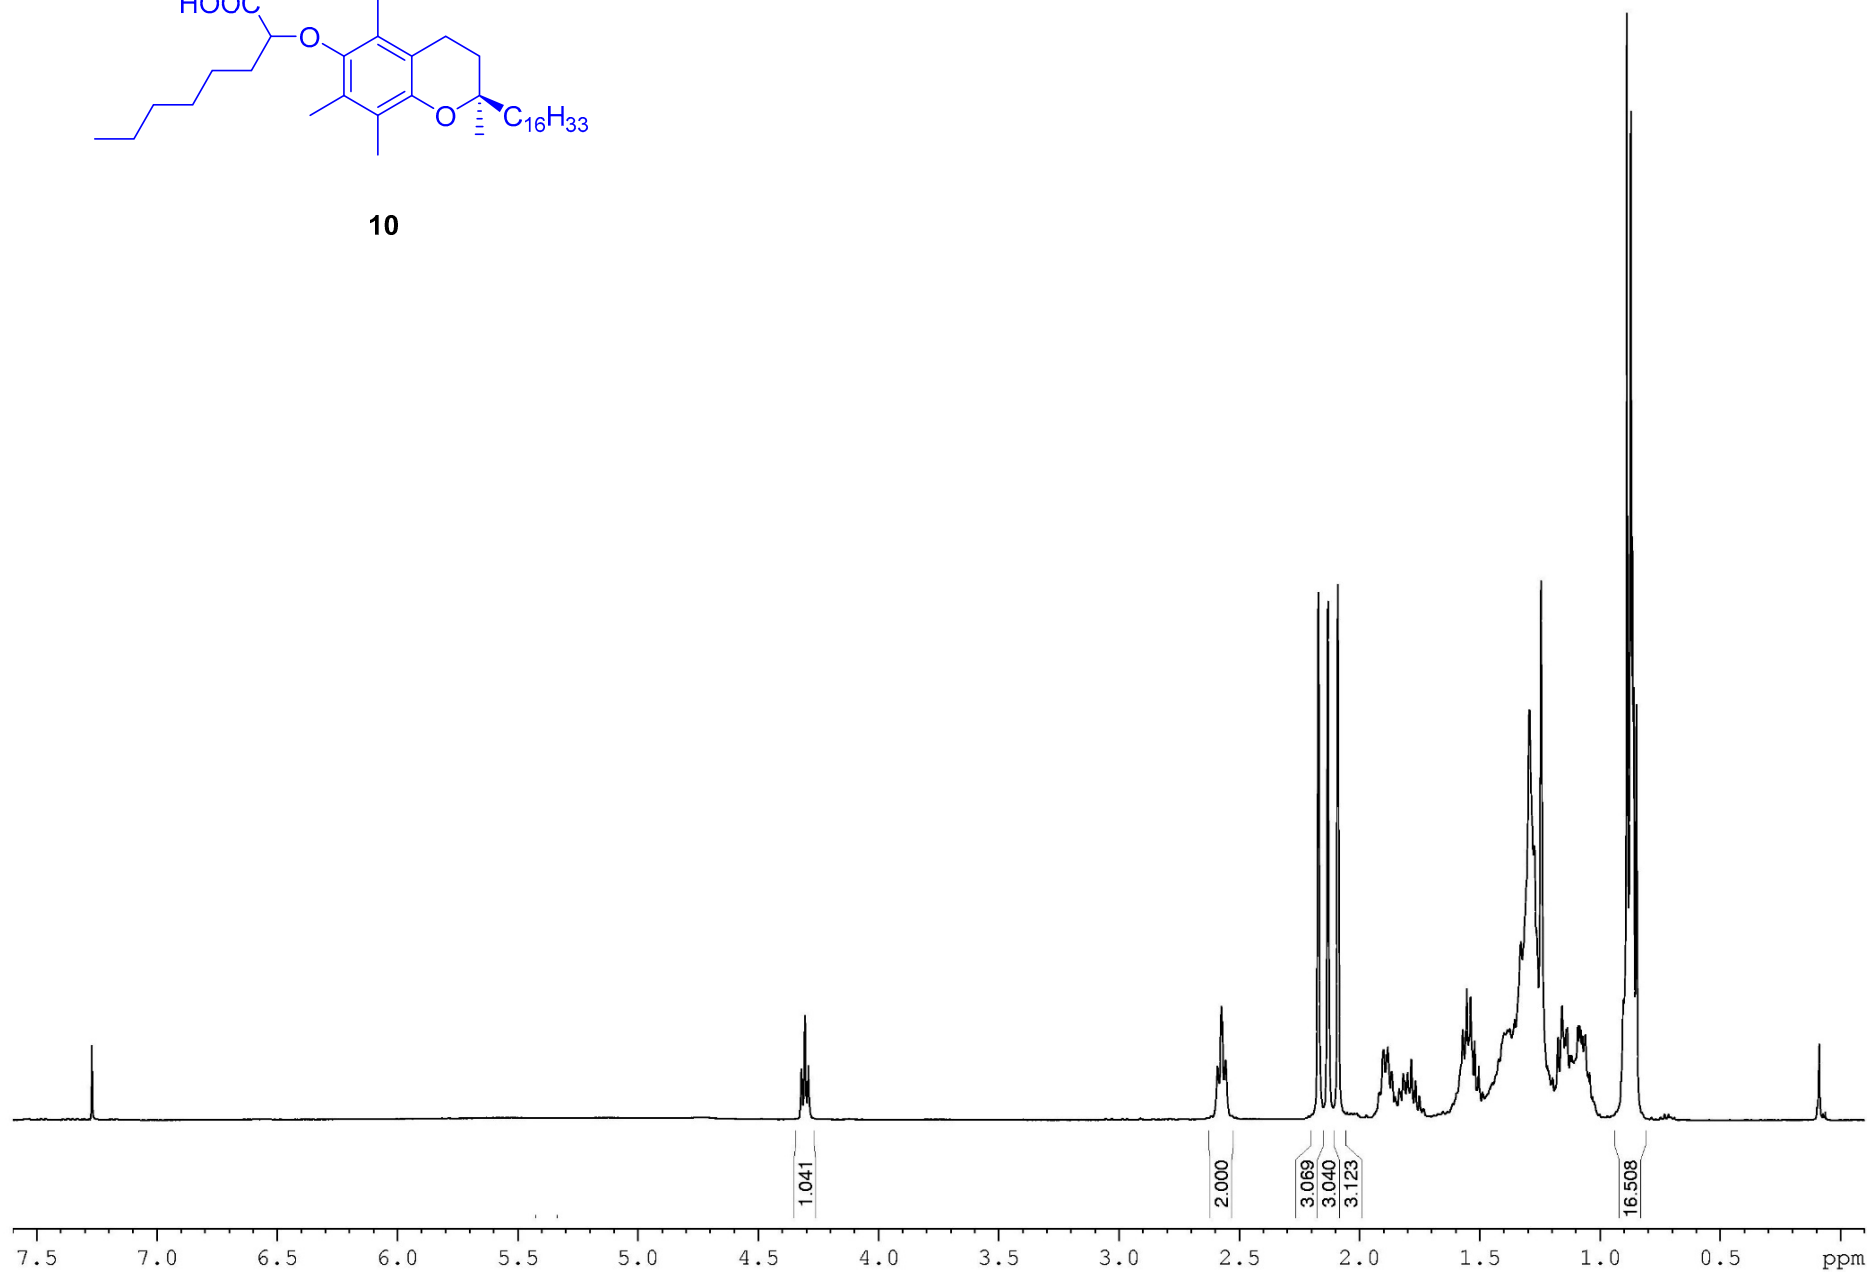

S23

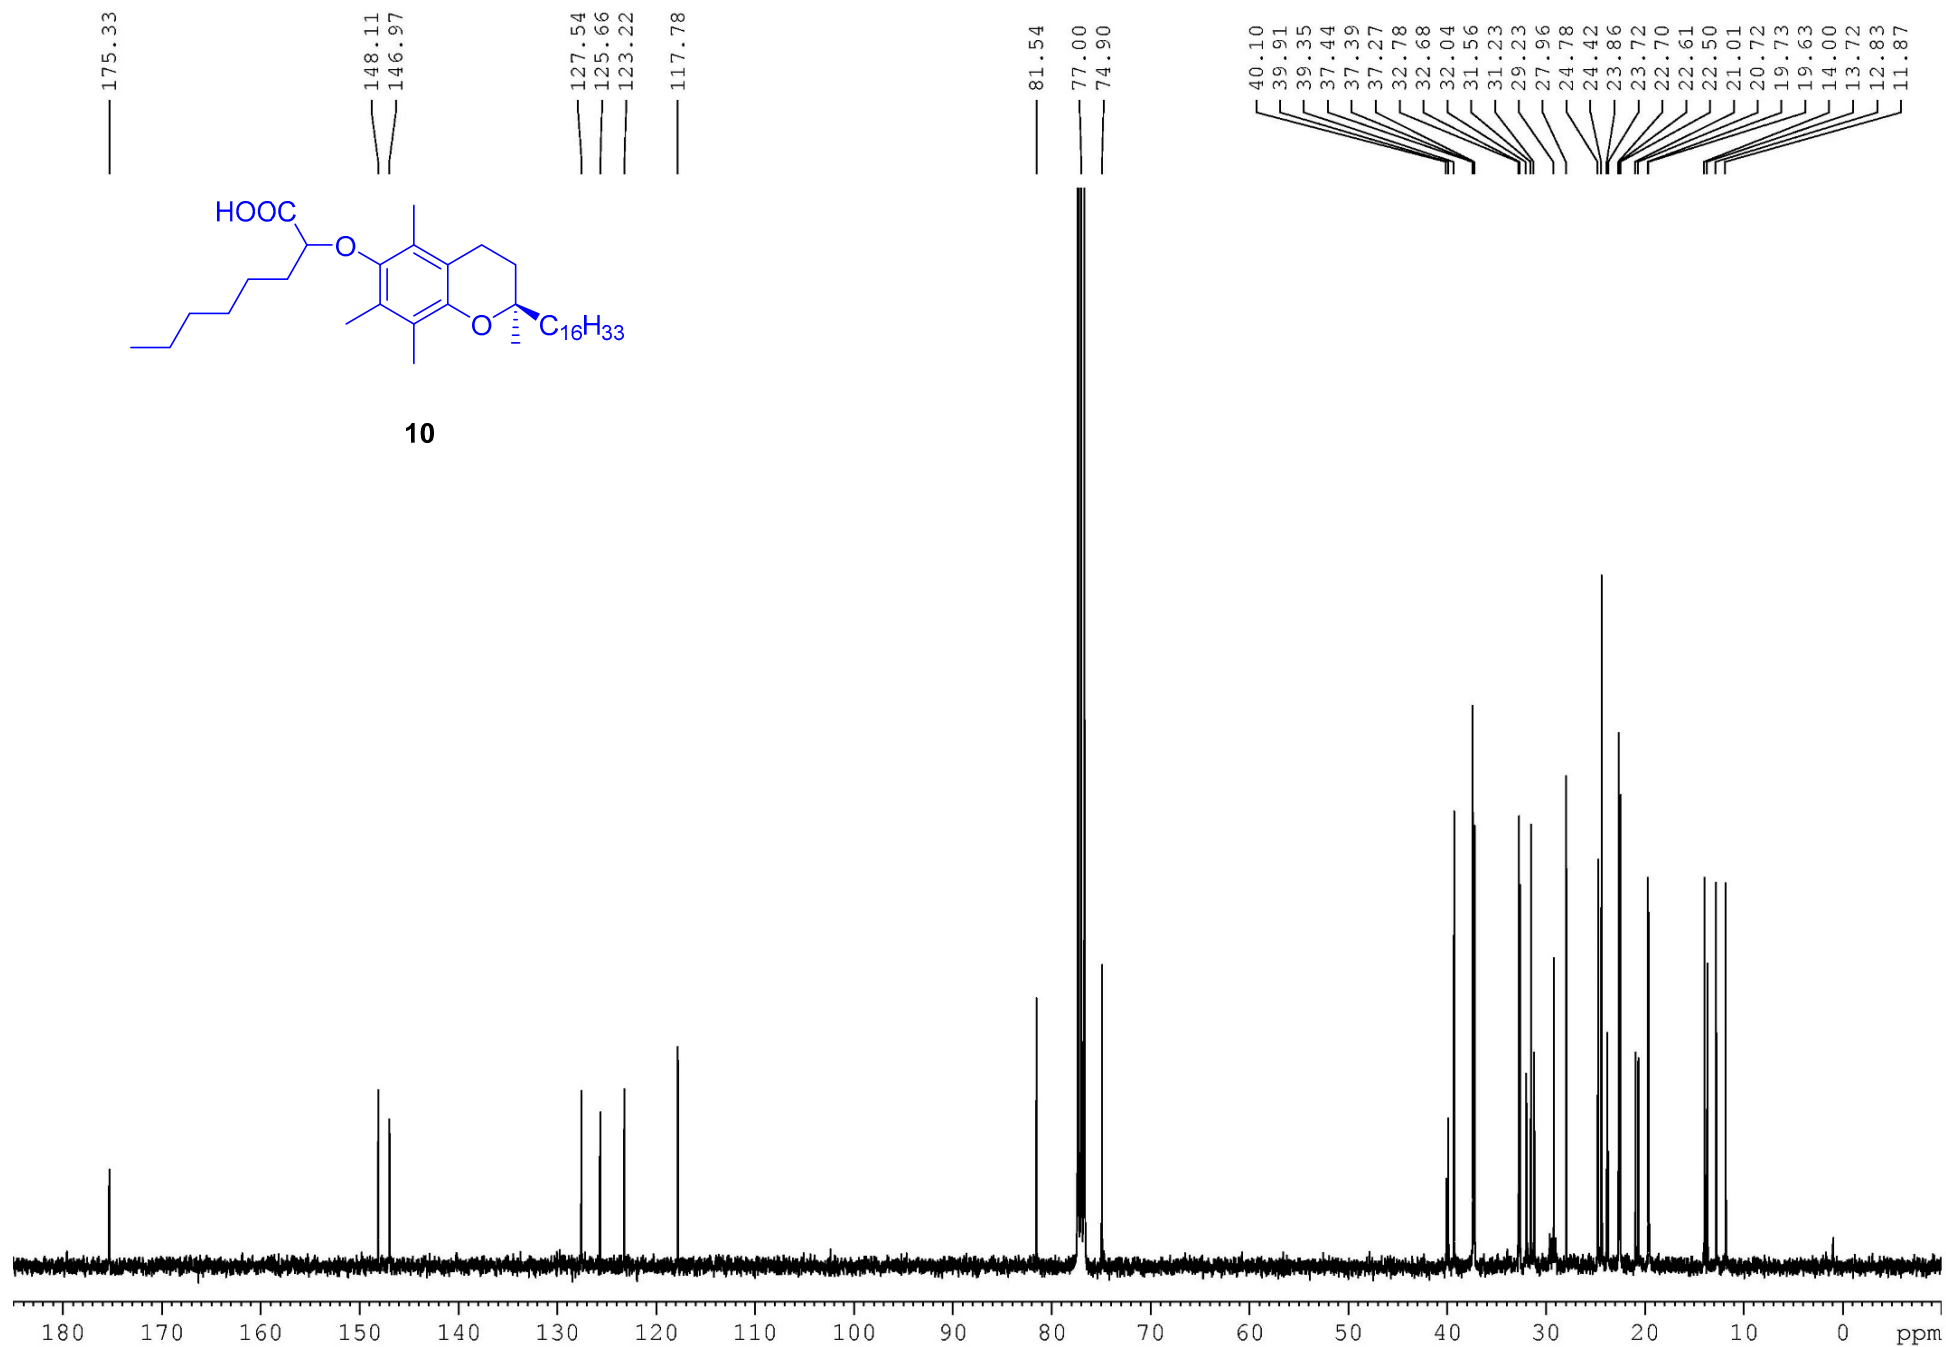

Supplement: s1 [file s1 › processes-2403039-supplementary.pdf]
